# Supplementary material for: Experimental assessment of diffusible iodine-based contrast-enhanced computed tomography (diceCT) protocols
Source: PeerJ. 2024 Sep 5;12:e17919. doi: 10.7717/peerj.17919 (PMC11380835; doi:10.7717/peerj.17919)
Supplement: Supplemental Information 4 [file peerj-12-17919-s004.xlsx]

## Sheet: Figure 2
NOTES	Day 0											Day 7											Day 14											Day 21											Day 28
Thigh	Line 1		Line 2		Line 3		Average					Line 1		Line 2		Line 3		Average					Line 1		Line 2		Line 3		Average					Line 1		Line 2		Line 3		Average					Line 1		Line 2		Line 3
Fixed line length 200 units	X	Y	X	Y	X	Y	Y	Y	Y	X	Y	X	Y	X	Y	X	Y	Y	Y	Y	X	Y	X	Y	X	Y	X	Y	Y	Y	Y	X	Y	X	Y	X	Y	X	Y	Y	Y	Y	X	Y	X	Y	X	Y	X
centered in femur and stretched outwards	0	0	0	0	0	0	0	0	0	0	0	0	0	0	0	0	0	0	0	0	0	0	0	0	0	0	0	0	0	0	0	0	0	0	0	0	0	0	0	0	0	0	0	0	0	0	0	0	0
Average of 3 lines	1	0	1	0	1	0	0	0	0	1	0	1	0	1	0	1	0	0	0	0	1	0	1	0	1	0	1	0	0	0	0	1	0	1	0	1	0	1	0	0	0	0	1	0	1	0	1	0	1
	2	0	2	0	2	0	0	0	0	2	0	2	0	2	0	2	0	0	0	0	2	0	2	0	2	0	2	0	0	0	0	2	0	2	0	2	0	2	0	0	0	0	2	0	2	0	2	0	2
	3	0	3	0	3	0	0	0	0	3	0	3	0	3	0	3	0	0	0	0	3	0	3	0	3	0	3	0	0	0	0	3	0	3	0	3	0	3	0	0	0	0	3	0	3	0	3	0	3
	4	0	4	0	4	0	0	0	0	4	0	4	0	4	0	4	0	0	0	0	4	0	4	0	4	0	4	0	0	0	0	4	0	4	0	4	0	4	0	0	0	0	4	0	4	0	4	0	4
	5	0	5	0	5	0	0	0	0	5	0	5	0	5	0	5	0	0	0	0	5	0	5	0	5	0	5	0	0	0	0	5	0	5	0	5	0	5	0	0	0	0	5	0	5	0	5	0	5
	6	0	6	0	6	0	0	0	0	6	0	6	0	6	0	6	0	0	0	0	6	0	6	0	6	0	6	0	0	0	0	6	0	6	0	6	0	6	0	0	0	0	6	0	6	0	6	0	6
	7	0	7	0	7	0	0	0	0	7	0	7	0	7	0	7	0	0	0	0	7	0	7	0	7	0	7	0	0	0	0	7	0	7	0	7	0	7	0	0	0	0	7	0	7	0	7	0	7
	8	0	8	0	8	0	0	0	0	8	0	8	0	8	0	8	0	0	0	0	8	0	8	0	8	0	8	0	0	0	0	8	0	8	0	8	0	8	0	0	0	0	8	0	8	0	8	0	8
	9	0	9	0	9	0	0	0	0	9	0	9	0	9	0	9	0	0	0	0	9	0	9	0	9	0	9	0	0	0	0	9	0	9	0	9	0	9	0	0	0	0	9	0	9	0	9	0	9
	10	0	10	0	10	0	0	0	0	10	0	10	0	10	0	10	0	0	0	0	10	0	10	0	10	0	10	0	0	0	0	10	0	10	0	10	0	10	0	0	0	0	10	0	10	0	10	0	10
	11	0	11	0	11	0	0	0	0	11	0	11	0	11	0	11	0	0	0	0	11	0	11	0	11	0	11	0	0	0	0	11	0	11	0	11	0	11	0	0	0	0	11	0	11	0	11	0	11
	12	0	12	0	12	0	0	0	0	12	0	12	5.452	12	5.282	12	2.972	5.452	5.282	2.972	12	4.56867	12	0	12	0	12	0	0	0	0	12	0	12	0	12	0	12	0	0	0	0	12	0	12	0	12	0	12
	13	0	13	0	13	0	0	0	0	13	0	13	67.19	13	66.556	13	54.032	67.19	66.556	54.032	13	62.5927	13	0	13	0	13	0	0	0	0	13	0	13	0	13	0	13	0	0	0	0	13	0	13	0	13	0	13
	14	0	14	0	14	0	0	0	0	14	0	14	238.441	14	239.001	14	247.501	238.441	239.001	247.501	14	241.648	14	0	14	0	14	0	0	0	0	14	0	14	0	14	0	14	0	0	0	0	14	0	14	0	14	0	14
	15	0	15	0	15	0	0	0	0	15	0	15	246.565	15	246.929	15	251.213	246.565	246.929	251.213	15	248.236	15	0	15	0	15	0	0	0	0	15	0	15	0	15	0	15	0	0	0	0	15	0	15	0	15	0	15
	16	1.676	16	0	16	0	1.676	0	0	16	0.558667	16	224.169	16	223.954	16	223.934	224.169	223.954	223.934	16	224.019	16	0	16	0	16	0	0	0	0	16	0	16	0	16	0	16	0	0	0	0	16	0	16	0	16	0	16
	17	39.921	17	1.272	17	2.586	39.921	1.272	2.586	17	14.593	17	220.607	17	220.498	17	223.078	220.607	220.498	223.078	17	221.394	17	0.846	17	0.764	17	0.455	0.846	0.764	0.455	17	0.688333	17	0	17	0	17	0	0	0	0	17	0	17	0	17	0	17
	18	60.933	18	39.722	18	40.358	60.933	39.722	40.358	18	47.0043	18	217.688	18	217.878	18	220.296	217.688	217.878	220.296	18	218.621	18	26.881	18	25.735	18	20.625	26.881	25.735	20.625	18	24.4137	18	0	18	0	18	0	0	0	0	18	0	18	0	18	0	18
	19	64.959	19	61.572	19	60.117	64.959	61.572	60.117	19	62.216	19	212.977	19	213.339	19	213.336	212.977	213.339	213.336	19	213.217	19	222.565	19	223.372	19	227.177	222.565	223.372	227.177	19	224.371	19	5.745	19	2.61	19	2.472	5.745	2.61	2.472	19	3.609	19	0	19	0.774	19
	20	63.995	20	64.969	20	65.121	63.995	64.969	65.121	20	64.695	20	199.979	20	200.345	20	202.145	199.979	200.345	202.145	20	200.823	20	251.01	20	251.436	20	253.379	251.01	251.436	253.379	20	251.942	20	167.256	20	178.699	20	178.985	167.256	178.699	178.985	20	174.98	20	43.758	20	33.72	20
	21	63.968	21	64.018	21	63.937	63.968	64.018	63.937	21	63.9743	21	185.338	21	185.662	21	189.671	185.338	185.662	189.671	21	186.89	21	231.256	21	231.562	21	232.961	231.256	231.562	232.961	21	231.926	21	234.733	21	238.836	21	238.84	234.733	238.836	238.84	21	237.47	21	159.736	21	149.86	21
	22	64.525	22	64.634	22	63.055	64.525	64.634	63.055	22	64.0713	22	172.186	22	172.182	22	173.212	172.186	172.182	173.212	22	172.527	22	219.175	22	219.387	22	220.346	219.175	219.387	220.346	22	219.636	22	232.134	22	227.207	22	226.848	232.134	227.207	226.848	22	228.73	22	218.874	22	225.296	22
	23	65.053	23	64.867	23	63.927	65.053	64.867	63.927	23	64.6157	23	164.39	23	164.14	23	165.166	164.39	164.14	165.166	23	164.565	23	210.19	23	210.438	23	211.596	210.19	210.438	211.596	23	210.741	23	218.892	23	215.845	23	215.684	218.892	215.845	215.684	23	216.807	23	215.674	23	220.99	23
	24	64.586	24	65.714	24	64	64.586	65.714	64	24	64.7667	24	153.576	24	153.355	24	155.992	153.576	153.355	155.992	24	154.308	24	213.37	24	213.465	24	213.892	213.37	213.465	213.892	24	213.576	24	214.458	24	214.353	24	214.23	214.458	214.353	214.23	24	214.347	24	215.808	24	218.198	24
	25	65.015	25	64.901	25	64.062	65.015	64.901	64.062	25	64.6593	25	146.28	25	146.416	25	148.422	146.28	146.416	148.422	25	147.039	25	212.748	25	213.046	25	214.393	212.748	213.046	214.393	25	213.396	25	217.341	25	214.878	25	214.608	217.341	214.878	214.608	25	215.609	25	218.431	25	218.084	25
	26	65.329	26	65.002	26	65.057	65.329	65.002	65.057	26	65.1293	26	137.352	26	137.722	26	141.813	137.352	137.722	141.813	26	138.962	26	201.955	26	202.377	26	204.352	201.955	202.377	204.352	26	202.895	26	210.096	26	205.936	26	205.748	210.096	205.936	205.748	26	207.26	26	215.425	26	217.291	26
	27	64.347	27	65.017	27	65.859	64.347	65.017	65.859	27	65.0743	27	106.929	27	107.362	27	112.865	106.929	107.362	112.865	27	109.052	27	195.342	27	195.27	27	194.931	195.342	195.27	194.931	27	195.181	27	200.244	27	197.738	27	197.665	200.244	197.738	197.665	27	198.549	27	209.394	27	212.666	27
	28	64.631	28	64.018	28	64.928	64.631	64.018	64.928	28	64.5257	28	102.065	28	101.901	28	99.871	102.065	101.901	99.871	28	101.279	28	191.524	28	191.439	28	191.046	191.524	191.439	191.046	28	191.336	28	193.635	28	194.612	28	194.65	193.635	194.612	194.65	28	194.299	28	204.106	28	204.288	28
	29	65.304	29	64.028	29	65.685	65.304	64.028	65.685	29	65.0057	29	96.638	29	96.671	29	97.605	96.638	96.671	97.605	29	96.9713	29	192.222	29	192.165	29	191.878	192.222	192.165	191.878	29	192.088	29	193.463	29	193.345	29	193.306	193.463	193.345	193.306	29	193.371	29	195.193	29	195.275	29
	30	66.256	30	65.018	30	65.731	66.256	65.018	65.731	30	65.6683	30	93.563	30	93.767	30	95.999	93.563	93.767	95.999	30	94.443	30	187.148	30	187.323	30	187.99	187.148	187.323	187.99	30	187.487	30	195.914	30	192.678	30	192.492	195.914	192.678	192.492	30	193.695	30	190.734	30	193.127	30
	31	65.594	31	66.973	31	64.713	65.594	66.973	64.713	31	65.76	31	92.872	31	93.055	31	94.438	92.872	93.055	94.438	31	93.455	31	186.394	31	186.909	31	188.854	186.394	186.909	188.854	31	187.386	31	195.988	31	193.183	31	193.023	195.988	193.183	193.023	31	194.065	31	192.199	31	196.128	31
	32	65.802	32	65.997	32	64.603	65.802	65.997	64.603	32	65.4673	32	93.298	32	93.339	32	93.356	93.298	93.339	93.356	32	93.331	32	177.958	32	178.893	32	183.074	177.958	178.893	183.074	32	179.975	32	163.557	32	162.431	32	162.369	163.557	162.431	162.369	32	162.786	32	193.778	32	197.674	32
	33	65.143	33	65.855	33	65.341	65.143	65.855	65.341	33	65.4463	33	92.691	33	92.511	33	91.177	92.691	92.511	91.177	33	92.1263	33	155.818	33	155.115	33	155.4	155.818	155.115	155.4	33	155.444	33	149.46	33	150.14	33	150.165	149.46	150.14	150.165	33	149.922	33	200.245	33	201.045	33
	34	65.077	34	65	34	65.638	65.077	65	65.638	34	65.2383	34	91.131	34	91.046	34	90.928	91.131	91.046	90.928	34	91.035	34	156.309	34	155.385	34	153.817	156.309	155.385	153.817	34	155.17	34	164.908	34	184.657	34	185.665	164.908	184.657	185.665	34	178.41	34	200.842	34	197.569	34
	35	64.11	35	64.979	35	65.546	64.11	64.979	65.546	35	64.8783	35	91.506	35	91.808	35	93.689	91.506	91.808	93.689	35	92.3343	35	155.687	35	154.458	35	150.211	155.687	154.458	150.211	35	153.452	35	173.262	35	194.356	35	195.462	173.262	194.356	195.462	35	187.693	35	193.259	35	189.893	35
	36	65.031	36	64.226	36	64.581	65.031	64.226	64.581	36	64.6127	36	92.081	36	92.317	36	93.274	92.081	92.317	93.274	36	92.5573	36	144.963	36	144.143	36	143.028	144.963	144.143	143.028	36	144.045	36	218.464	36	211.348	36	210.981	218.464	211.348	210.981	36	213.598	36	181.262	36	183.357	36
	37	65.953	37	65.025	37	65.024	65.953	65.025	65.024	37	65.334	37	91.089	37	91.202	37	92.309	91.089	91.202	92.309	37	91.5333	37	132.071	37	132.015	37	136.626	132.071	132.015	136.626	37	133.571	37	209.907	37	206.135	37	205.939	209.907	206.135	205.939	37	207.327	37	161.351	37	185.46	37
	38	65	38	65.976	38	65.472	65	65.976	65.472	38	65.4827	38	90.09	38	90.087	38	91.265	90.09	90.087	91.265	38	90.4807	38	129.558	38	129.771	38	134.653	129.558	129.771	134.653	38	131.327	38	202.276	38	200.454	38	200.36	202.276	200.454	200.36	38	201.03	38	155.196	38	180.384	38
	39	65.031	39	65	39	64.605	65.031	65	64.605	39	64.8787	39	91.026	39	91.02	39	91.461	91.026	91.02	91.461	39	91.169	39	128.517	39	128.668	39	131.947	128.517	128.668	131.947	39	129.711	39	194.711	39	192.501	39	192.383	194.711	192.501	192.383	39	193.198	39	171.656	39	166.606	39
	40	66.031	40	65.024	40	65.446	66.031	65.024	65.446	40	65.5003	40	91.176	40	91.135	40	91.424	91.176	91.135	91.424	40	91.245	40	120.775	40	120.737	40	121.789	120.775	120.737	121.789	40	121.1	40	177.386	40	179.511	40	179.614	177.386	179.511	179.614	40	178.837	40	178.838	40	164.672	40
	41	66.97	41	66.023	41	66.388	66.97	66.023	66.388	41	66.4603	41	90.701	41	90.816	41	89.88	90.701	90.816	89.88	41	90.4657	41	112.762	41	113.039	41	114.939	112.762	113.039	114.939	41	113.58	41	165.769	41	174.318	41	174.753	165.769	174.318	174.753	41	171.613	41	179.784	41	173.327	41
	42	65.97	42	66.977	42	66.939	65.97	66.977	66.939	42	66.6287	42	91.535	42	91.699	42	89.081	91.535	91.699	89.081	42	90.7717	42	107.935	42	108.134	42	109.061	107.935	108.134	109.061	42	108.377	42	168.076	42	178.951	42	179.509	168.076	178.951	179.509	42	175.512	42	183.648	42	180.642	42
	43	65.029	43	65.978	43	65.689	65.029	65.978	65.689	43	65.5653	43	90.617	43	90.72	43	89.126	90.617	90.72	89.126	43	90.1543	43	105.864	43	105.936	43	106.273	105.864	105.936	106.273	43	106.024	43	159.312	43	163.377	43	163.587	159.312	163.377	163.587	43	162.092	43	184.96	43	184.375	43
	44	66	44	65.022	44	65.034	66	65.022	65.034	44	65.352	44	88.021	44	88.066	44	89.402	88.021	88.066	89.402	44	88.4963	44	100.835	44	100.781	44	100.522	100.835	100.781	100.522	44	100.713	44	160.84	44	160.856	44	160.861	160.84	160.856	160.861	44	160.852	44	183.224	44	184.096	44
	45	65.951	45	66	45	65.802	65.951	66	65.802	45	65.9177	45	88.273	45	88.457	45	90.767	88.273	88.457	90.767	45	89.1657	45	98.053	45	98.127	45	98.455	98.053	98.127	98.455	45	98.2117	45	153.83	45	146.537	45	146.163	153.83	146.537	146.163	45	148.843	45	177.953	45	178.07	45
	46	64.26	46	65.968	46	65.769	64.26	65.968	65.769	46	65.3323	46	89.98	46	89.918	46	89.224	89.98	89.918	89.224	46	89.7073	46	96.635	46	96.951	46	98.401	96.635	96.951	98.401	46	97.329	46	145.394	46	138.327	46	137.965	145.394	138.327	137.965	46	140.562	46	168.529	46	168.432	46
	47	63.971	47	64.515	47	64.081	63.971	64.515	64.081	47	64.189	47	90.649	47	90.491	47	88.629	90.649	90.491	88.629	47	89.923	47	94.983	47	95.354	47	97.057	94.983	95.354	97.057	47	95.798	47	135.101	47	134.028	47	134.139	135.101	134.028	134.139	47	134.423	47	152.687	47	153.78	47
	48	66	48	64.656	48	63.275	66	64.656	63.275	48	64.6437	48	91.134	48	90.953	48	88.72	91.134	90.953	88.72	48	90.269	48	93.596	48	93.993	48	95.843	93.596	93.993	95.843	48	94.4773	48	134.484	48	134.999	48	135.022	134.484	134.999	135.022	48	134.835	48	144.923	48	148.158	48
	49	65.984	49	66	49	66	65.984	66	66	49	65.9947	49	89.925	49	89.941	49	90.067	89.925	89.941	90.067	49	89.9777	49	97.939	49	97.943	49	97.96	97.939	97.943	97.96	49	97.9473	49	134.899	49	133.398	49	132.915	134.899	133.398	132.915	49	133.737	49	153.39	49	160.212	49
	50	65.411	50	65.992	50	65.96	65.411	65.992	65.96	50	65.7877	50	89.198	50	89.399	50	91.75	89.198	89.399	91.75	50	90.1157	50	95.936	50	95.945	50	95.976	95.936	95.945	95.976	50	95.9523	50	129.708	50	123.689	50	123.068	129.708	123.689	123.068	50	125.488	50	160.541	50	166.094	50
	51	65.855	51	65.639	51	65.043	65.855	65.639	65.043	51	65.5123	51	89.62	51	89.923	51	93.646	89.62	89.923	93.646	51	91.063	51	93.934	51	94.103	51	94.88	93.934	94.103	94.88	51	94.3057	51	108.531	51	105.701	51	105.601	108.531	105.701	105.601	51	106.611	51	158.534	51	157.976	51
	52	65.453	52	66.297	52	65.16	65.453	66.297	65.16	52	65.6367	52	91.393	52	91.43	52	91.919	91.393	91.43	91.919	52	91.5807	52	94.065	52	94.224	52	94.965	94.065	94.224	94.965	52	94.418	52	103.204	52	102.249	52	102.326	103.204	102.249	102.326	52	102.593	52	152.115	52	150.935	52
	53	65.024	53	65.67	53	65.117	65.024	65.67	65.117	53	65.2703	53	90.953	53	90.889	53	90.17	90.953	90.889	90.17	53	90.6707	53	94.989	53	94.989	53	94.987	94.989	94.989	94.987	53	94.9883	53	101.735	53	101.304	53	101.379	101.735	101.304	101.379	53	101.473	53	143.997	53	142.008	53
	54	65.93	54	65.01	54	65.062	65.93	65.01	65.062	54	65.334	54	89.655	54	89.877	54	92.321	89.655	89.877	92.321	54	90.6177	54	94.645	54	94.585	54	94.318	94.645	94.585	94.318	54	94.516	54	100.358	54	100.129	54	100.153	100.358	100.129	100.153	54	100.213	54	140.625	54	134.899	54
	55	65.333	55	65.509	55	66.59	65.333	65.509	66.59	55	65.8107	55	90.876	55	91.167	55	93.717	90.876	91.167	93.717	55	91.92	55	96.667	55	96.51	55	95.788	96.667	96.51	95.788	55	96.3217	55	100.664	55	100.713	55	100.665	100.664	100.713	100.665	55	100.681	55	139.336	55	133.956	55
	56	65.991	56	64.722	56	66.266	65.991	64.722	66.266	56	65.6597	56	89.234	56	89.313	56	89.813	89.234	89.313	89.813	56	89.4533	56	97.026	56	96.828	56	95.911	97.026	96.828	95.911	56	96.5883	56	100.117	56	100.506	56	100.436	100.117	100.506	100.436	56	100.353	56	138.217	56	136.731	56
	57	65.589	57	65.997	57	65.975	65.589	65.997	65.975	57	65.8537	57	89.083	57	89.077	57	89.449	89.083	89.077	89.449	57	89.203	57	95.448	57	95.307	57	94.645	95.448	95.307	94.645	57	95.1333	57	99.968	57	99.444	57	99.377	99.968	99.444	99.377	57	99.5963	57	136.543	57	134.749	57
	58	64.021	58	65.793	58	65.277	64.021	65.793	65.277	58	65.0303	58	90.206	58	90.168	58	90.206	90.206	90.168	90.206	58	90.1933	58	95.633	58	95.779	58	96.452	95.633	95.779	96.452	58	95.9547	58	98.303	58	97.826	58	97.802	98.303	97.826	97.802	58	97.977	58	130.787	58	127.888	58
	59	65.021	59	64.016	59	64.033	65.021	64.016	64.033	59	64.3567	59	89.401	59	89.365	59	89.121	89.401	89.365	89.121	59	89.2957	59	94.733	59	94.873	59	95.525	94.733	94.873	95.525	59	95.0437	59	102	59	101.122	59	101.035	102	101.122	101.035	59	101.386	59	127.356	59	123.408	59
	60	66	60	65.016	60	65.032	66	65.016	65.032	60	65.3493	60	92.367	60	92.482	60	92.238	92.367	92.482	92.238	60	92.3623	60	93.589	60	93.638	60	93.861	93.589	93.638	93.861	60	93.696	60	101.885	60	100.767	60	100.664	101.885	100.767	100.664	60	101.105	60	126.255	60	121.665	60
	61	65.985	61	66	61	66	65.985	66	66	61	65.995	61	89.952	61	89.987	61	89.683	89.952	89.987	89.683	61	89.874	61	92.335	61	92.423	61	92.829	92.335	92.423	92.829	61	92.529	61	95.31	61	95.009	61	95.009	95.31	95.009	95.009	61	95.1093	61	117.967	61	116.196	61
	62	65.231	62	65.986	62	65.985	65.231	65.986	65.985	62	65.734	62	90.949	62	90.985	62	91.432	90.949	90.985	91.432	62	91.122	62	93.351	62	93.441	62	93.854	93.351	93.441	93.854	62	93.5487	62	96.316	62	96.301	62	96.319	96.316	96.301	96.319	62	96.312	62	115.166	62	113.378	62
	63	66.003	63	65.051	63	65.494	66.003	65.051	65.494	63	65.516	63	90.898	63	90.974	63	91.87	90.898	90.974	91.87	63	91.2473	63	92.197	63	92.323	63	92.904	92.197	92.323	92.904	63	92.4747	63	101.128	63	99.802	63	99.725	101.128	99.802	99.725	63	100.218	63	123.302	63	118.881	63
	64	66.149	64	66	64	66.013	66.149	66	66.013	64	66.054	64	89.316	64	89.407	64	90.535	89.316	89.407	90.535	64	89.7527	64	93.267	64	93.39	64	93.959	93.267	93.39	93.959	64	93.5387	64	98.087	64	97.362	64	97.325	98.087	97.362	97.325	64	97.5913	64	128.078	64	122.808	64
	65	65.982	65	65.981	65	66.388	65.982	65.981	66.388	65	66.117	65	91.827	65	91.792	65	91.394	91.827	91.792	91.394	65	91.671	65	92.798	65	92.837	65	93.038	92.798	92.837	93.038	65	92.891	65	96.103	65	95.998	65	95.998	96.103	95.998	95.998	65	96.033	65	123.754	65	119.248	65
	66	64.998	66	65.94	66	65.973	64.998	65.94	65.973	66	65.637	66	90.415	66	90.322	66	89.205	90.415	90.322	89.205	66	89.9807	66	93.031	66	93.026	66	93.013	93.031	93.026	93.013	66	93.0233	66	97.028	66	95.622	66	95.549	97.028	95.622	95.549	66	96.0663	66	123.87	66	119.218	66
	67	64.945	67	64.925	67	64.992	64.945	64.925	64.992	67	64.954	67	88.546	67	88.488	67	87.773	88.546	88.488	87.773	67	88.269	67	94.389	67	94.278	67	93.988	94.389	94.278	93.988	67	94.2183	67	99.191	67	100.871	67	100.958	99.191	100.871	100.958	67	100.34	67	132.904	67	129.417	67
	68	65	68	64.896	68	64.728	65	64.896	64.728	68	64.8747	68	88.179	68	88.213	68	88.612	88.179	88.213	88.612	68	88.3347	68	93.194	68	93.125	68	93.104	93.194	93.125	93.104	68	93.141	68	102.228	68	103.181	68	103.231	102.228	103.181	103.231	68	102.88	68	131.445	68	132.075	68
	69	65.007	69	64.739	69	65.006	65.007	64.739	65.006	69	64.9173	69	86.553	69	86.574	69	86.844	86.553	86.574	86.844	69	86.657	69	92.746	69	92.887	69	93.27	92.746	92.887	93.27	69	92.9677	69	105.727	69	104.757	69	104.708	105.727	104.757	104.708	69	105.064	69	107.802	69	109.646	69
	70	65.985	70	64.854	70	65.213	65.985	64.854	65.213	70	65.3507	70	91.441	70	91.469	70	91.797	91.441	91.469	91.797	70	91.569	70	93.914	70	94.016	70	93.86	93.914	94.016	93.86	70	93.93	70	104.889	70	102.125	70	101.983	104.889	102.125	101.983	70	102.999	70	94.649	70	95.811	70
	71	65.026	71	65.989	71	65.818	65.026	65.989	65.818	71	65.611	71	92.761	71	92.821	71	93.53	92.761	92.821	93.53	71	93.0373	71	94.916	71	95.021	71	95.503	94.916	95.021	95.503	71	95.1467	71	100.958	71	98.874	71	98.767	100.958	98.874	98.767	71	99.533	71	110.283	71	110.01	71
	72	66.688	72	65.015	72	64.926	66.688	65.015	64.926	72	65.543	72	90.426	72	90.506	72	91.463	90.426	90.506	91.463	72	90.7983	72	90.069	72	90.132	72	90.426	90.069	90.132	90.426	72	90.209	72	100.185	72	100.467	72	100.482	100.185	100.467	100.482	72	100.378	72	129.046	72	127.085	72
	73	66.715	73	66.273	73	66.921	66.715	66.273	66.921	73	66.6363	73	89.485	73	89.514	73	89.85	89.485	89.514	89.85	73	89.6163	73	90	73	90	73	90	90	90	90	73	90	73	100.756	73	100.497	73	100.484	100.756	100.497	100.484	73	100.579	73	128.317	73	126.616	73
	74	65.834	74	66.45	74	66.941	65.834	66.45	66.941	74	66.4083	74	88.209	74	88.257	74	88.837	88.209	88.257	88.837	74	88.4343	74	89.983	74	89.984	74	89.987	89.983	89.984	89.987	74	89.9847	74	97.549	74	96.997	74	96.969	97.549	96.997	96.969	74	97.1717	74	125.706	74	122.834	74
	75	65.987	75	65.704	75	65.999	65.987	65.704	65.999	75	65.8967	75	88.676	75	88.697	75	88.961	88.676	88.697	88.961	75	88.778	75	88.944	75	88.909	75	88.751	88.944	88.909	88.751	75	88.868	75	99.179	75	98.424	75	98.385	99.179	98.424	98.385	75	98.6627	75	125.395	75	122.687	75
	76	65.012	76	65.991	76	65.981	65.012	65.991	65.981	76	65.6613	76	89.201	76	89.18	76	88.938	89.201	89.18	88.938	76	89.1063	76	94.302	76	94.193	76	93.69	94.302	94.193	93.69	76	94.0617	76	96.936	76	97.648	76	97.685	96.936	97.648	97.685	76	97.423	76	125.346	76	123.217	76
	77	65.988	77	65.009	77	65.018	65.988	65.009	65.018	77	65.3383	77	86.457	77	86.414	77	86.063	86.457	86.414	86.063	77	86.3113	77	93.79	77	93.763	77	93.641	93.79	93.763	93.641	77	93.7313	77	102.001	77	101.989	77	101.989	102.001	101.989	101.989	77	101.993	77	125.674	77	124.068	77
	78	65.007	78	65.991	78	65.982	65.007	65.991	65.982	78	65.66	78	85.635	78	85.572	78	85.059	85.635	85.572	85.059	78	85.422	78	93.516	78	93.466	78	93.233	93.516	93.466	93.233	78	93.405	78	101.749	78	99.024	78	98.885	101.749	99.024	98.885	78	99.886	78	121.735	78	121.297	78
	79	65.653	79	65.007	79	65.005	65.653	65.007	65.005	79	65.2217	79	87.871	79	87.89	79	88.126	87.871	87.89	88.126	79	87.9623	79	93.417	79	93.371	79	93.159	93.417	93.371	93.159	79	93.3157	79	100.134	79	97.992	79	97.882	100.134	97.992	97.882	79	98.6693	79	122.411	79	121.539	79
	80	65.357	80	65.875	80	65.398	65.357	65.875	65.398	80	65.5433	80	87.946	80	87.947	80	88.136	87.946	87.947	88.136	80	88.0097	80	91.012	80	91.011	80	91.008	91.012	91.011	91.008	80	91.0103	80	95.842	80	96.241	80	96.261	95.842	96.241	96.261	80	96.1147	80	122.899	80	120.888	80
	81	65.019	81	65.464	81	65.237	65.019	65.464	65.237	81	65.24	81	86.078	81	86.041	81	86.424	86.078	86.041	86.424	81	86.181	81	92.026	81	92.025	81	92.018	92.026	92.025	92.018	81	92.023	81	97.831	81	96.823	81	96.772	97.831	96.823	96.772	81	97.142	81	126.849	81	124.965	81
	82	66.996	82	65.014	82	65.029	66.996	65.014	65.029	82	65.6797	82	86.971	82	86.953	82	86.745	86.971	86.953	86.745	82	86.8897	82	94.363	82	94.384	82	94.482	94.363	94.384	94.482	82	94.4097	82	102.21	82	100.733	82	100.657	102.21	100.733	100.657	82	101.2	82	129.913	82	127.939	82
	83	66.526	83	66.997	83	66.996	66.526	66.997	66.996	83	66.8397	83	86.866	83	86.834	83	86.443	86.866	86.834	86.443	83	86.7143	83	92.762	83	92.703	83	92.433	92.762	92.703	92.433	83	92.6327	83	99.009	83	97.595	83	97.523	99.009	97.595	97.523	83	98.0423	83	131.802	83	130.44	83
	84	64.516	84	66.436	84	66.614	64.516	66.436	66.614	84	65.8553	84	88.177	84	88.19	84	88.352	88.177	88.19	88.352	84	88.2397	84	93.06	84	93.026	84	92.869	93.06	93.026	92.869	84	92.985	84	100.307	84	99.14	84	99.08	100.307	99.14	99.08	84	99.509	84	132.04	84	131.087	84
	85	64.952	85	64.423	85	64.607	64.952	64.423	64.607	85	64.6607	85	89.823	85	89.808	85	89.628	89.823	89.808	89.628	85	89.753	85	88.526	85	88.508	85	88.427	88.526	88.508	88.427	85	88.487	85	102.203	85	101.425	85	101.385	102.203	101.425	101.385	85	101.671	85	130.364	85	128.94	85
	86	64.088	86	64.782	86	65.105	64.088	64.782	65.105	86	64.6583	86	90.313	86	90.271	86	89.778	90.313	90.271	89.778	86	90.1207	86	89.53	86	89.545	86	89.615	89.53	89.545	89.615	86	89.5633	86	101.546	86	99.939	86	99.857	101.546	99.939	99.857	86	100.447	86	119.521	86	118.508	86
	87	61.927	87	64.261	87	63.934	61.927	64.261	63.934	87	63.374	87	92.39	87	92.366	87	92.076	92.39	92.366	92.076	87	92.2773	87	91	87	91	87	91	91	91	91	87	91	87	104.097	87	101.959	87	101.849	104.097	101.959	101.849	87	102.635	87	114.266	87	113.8	87
	88	62.77	88	62.32	88	61.615	62.77	62.32	61.615	88	62.235	88	91.549	88	91.541	88	91.442	91.549	91.541	91.442	88	91.5107	88	91.03	88	91.028	88	91.02	91.03	91.028	91.02	88	91.026	88	100.993	88	100.997	88	100.997	100.993	100.997	100.997	88	100.996	88	115.778	88	115.046	88
	89	63.02	89	62.618	89	62.883	63.02	62.618	62.883	89	62.8403	89	85.923	89	85.927	89	85.958	85.923	85.927	85.958	89	85.936	89	95.238	89	95.263	89	95.38	95.238	95.263	95.38	89	95.2937	89	99.68	89	99.791	89	99.797	99.68	99.791	99.797	89	99.756	89	119.159	89	118.293	89
	90	56.646	90	62.816	90	63.148	56.646	62.816	63.148	90	60.87	90	81.365	90	81.394	90	81.744	81.365	81.394	81.744	90	81.501	90	94.62	90	94.634	90	94.696	94.62	94.634	94.696	90	94.65	90	100.274	90	100.182	90	100.178	100.274	100.182	100.178	90	100.211	90	116.262	90	115.752	90
	91	58.553	91	56.511	91	56.724	58.553	56.511	56.724	91	57.2627	91	81.416	91	81.428	91	81.621	81.416	81.428	81.621	91	81.4883	91	88.601	91	88.582	91	88.493	88.601	88.582	88.493	91	88.5587	91	95.745	91	95.832	91	95.837	95.745	95.832	95.837	91	95.8047	91	114.124	91	114.275	91
	92	152.646	92	59.055	92	58.398	152.646	59.055	58.398	92	90.033	92	144.915	92	144.878	92	144.445	144.915	144.878	144.445	92	144.746	92	85.32	92	85.338	92	85.425	85.32	85.338	85.425	92	85.361	92	98.364	92	98.208	92	98.201	98.364	98.208	98.201	92	98.2577	92	124.395	92	124.28	92
	93	163.091	93	154.12	93	152.066	163.091	154.12	152.066	93	156.426	93	160.752	93	160.739	93	160.581	160.752	160.739	160.581	93	160.691	93	116.481	93	116.491	93	116.546	116.481	116.491	116.546	93	116.506	93	135.986	93	137.03	93	137.084	135.986	137.03	137.084	93	136.7	93	150.56	93	150.087	93
	94	159.312	94	163.318	94	163.024	159.312	163.318	163.024	94	161.885	94	160.166	94	160.166	94	160.156	160.166	160.166	160.156	94	160.163	94	165.401	94	165.388	94	165.328	165.401	165.388	165.328	94	165.372	94	160.125	94	160.431	94	160.447	160.125	160.431	160.447	94	160.334	94	160.612	94	160.548	94
	95	135.62	95	159.234	95	159.307	135.62	159.234	159.307	95	151.387	95	141.975	95	141.98	95	142.032	141.975	141.98	142.032	95	141.996	95	161.953	95	161.956	95	161.969	161.953	161.956	161.969	95	161.959	95	162.755	95	162.863	95	162.868	162.755	162.863	162.868	95	162.829	95	154.586	95	154.433	95
	96	80.406	96	135.146	96	135.585	80.406	135.146	135.585	96	117.046	96	101.446	96	101.442	96	101.379	101.446	101.442	101.379	96	101.422	96	145.846	96	145.822	96	145.706	145.846	145.822	145.706	96	145.791	96	116.927	96	116.265	96	116.23	116.927	116.265	116.23	96	116.474	96	140.295	96	139.908	96
	97	57.333	97	79.244	97	80.182	57.333	79.244	80.182	97	72.253	97	66.844	97	66.829	97	66.646	66.844	66.829	66.646	97	66.773	97	95.389	97	95.345	97	95.139	95.389	95.345	95.139	97	95.291	97	74.85	97	74.199	97	74.166	74.85	74.199	74.166	97	74.405	97	79.749	97	80.074	97
	98	60.679	98	57.61	98	57.445	60.679	57.61	57.445	98	58.578	98	74.787	98	74.791	98	74.835	74.787	74.791	74.835	98	74.8043	98	62.636	98	62.614	98	62.515	62.636	62.614	62.515	98	62.5883	98	73.005	98	73.002	98	73.002	73.005	73.002	73.002	98	73.003	98	75.739	98	75.804	98
	99	59.032	99	60.859	99	60.799	59.032	60.859	60.799	99	60.23	99	75.949	99	75.95	99	75.96	75.949	75.95	75.96	99	75.953	99	75.932	99	75.935	99	75.945	75.932	75.935	75.945	99	75.9373	99	79.059	99	79.038	99	79.037	79.059	79.038	79.037	99	79.0447	99	82.179	99	82.195	99
	100	59	100	59	100	59	59	59	59	100	59	100	78	100	78	100	78	78	78	78	100	78	100	78	100	78	100	78	78	78	78	100	78	100	80	100	80	100	80	80	80	80	100	80	100	85	100	85	100
	101	57.033	101	59.028	101	59.04	57.033	59.028	59.04	101	58.367	101	74.741	101	74.816	101	75.713	74.741	74.816	75.713	101	75.09	101	82.928	101	82.931	101	82.942	82.928	82.931	82.942	101	82.9337	101	83.028	101	83.019	101	83.018	83.028	83.019	83.018	101	83.0217	101	87.121	101	87.127	101
	102	54.067	102	57.058	102	57.083	54.067	57.058	57.083	102	56.0693	102	76.12	102	76.136	102	76.327	76.12	76.136	76.327	102	76.1943	102	78.936	102	78.938	102	78.947	78.936	78.938	78.947	102	78.9403	102	80.061	102	80.039	102	80.038	80.061	80.039	80.038	102	80.046	102	82.915	102	82.847	102
	103	118.421	103	54.088	103	54.127	118.421	54.088	54.127	103	75.5453	103	78.816	103	78.714	103	77.492	78.816	78.714	77.492	103	78.3407	103	71.53	103	71.512	103	71.429	71.53	71.512	71.429	103	71.4903	103	86.374	103	86.597	103	86.608	86.374	86.597	86.608	103	86.5263	103	82.205	103	82.916	103
	104	155.54	104	118.338	104	117.996	155.54	118.338	117.996	104	130.625	104	118.28	104	118.12	104	116.198	118.28	118.12	116.198	104	117.533	104	83.418	104	83.306	104	82.785	83.418	83.306	82.785	104	83.1697	104	119.883	104	120.29	104	120.31	119.883	120.29	120.31	104	120.161	104	122.204	104	123.514	104
	105	163.14	105	155.506	105	155.251	163.14	155.506	155.251	105	157.966	105	154.799	105	154.735	105	153.966	154.799	154.735	153.966	105	154.5	105	155.373	105	155.301	105	154.961	155.373	155.301	154.961	105	155.212	105	162.32	105	162.581	105	162.593	162.32	162.581	162.593	105	162.498	105	163.001	105	163.031	105
	106	144.865	106	163.15	106	163.202	144.865	163.15	163.202	106	157.072	106	161.597	106	161.587	106	161.464	161.597	161.587	161.464	106	161.549	106	160.844	106	160.783	106	160.502	160.844	160.783	160.502	106	160.71	106	162.001	106	162.001	106	162.001	162.001	162.001	162.001	106	162.001	106	166.483	106	166.732	106
	107	60.646	107	144.854	107	144.824	60.646	144.854	144.824	107	116.775	107	150.449	107	150.544	107	151.689	150.449	150.544	151.689	107	150.894	107	160.175	107	160.103	107	159.768	160.175	160.103	159.768	107	160.015	107	139.685	107	139.429	107	139.416	139.685	139.429	139.416	107	139.51	107	151.238	107	151.286	107
	108	60.998	108	60.611	108	61.454	60.998	60.611	61.454	108	61.021	108	85.595	108	85.608	108	85.79	85.595	85.608	85.79	108	85.6643	108	110.552	108	110.691	108	111.342	110.552	110.691	111.342	108	110.862	108	107.054	108	106.657	108	106.638	107.054	106.657	106.638	108	106.783	108	151.291	108	151.016	108
	109	64.273	109	60.998	109	61.001	64.273	60.998	61.001	109	62.0907	109	85.022	109	85.04	109	85.25	85.022	85.04	85.25	109	85.104	109	88.802	109	88.806	109	88.825	88.802	88.806	88.825	109	88.811	109	110.663	109	111.136	109	111.16	110.663	111.136	111.16	109	110.986	109	165.398	109	165.899	109
	110	65.315	110	64.267	110	64.373	65.315	64.267	64.373	110	64.6517	110	88.784	110	88.824	110	89.299	88.784	88.824	89.299	110	88.969	110	93.626	110	93.639	110	93.7	93.626	93.639	93.7	110	93.655	110	113.81	110	114.232	110	114.254	113.81	114.232	114.254	110	114.099	110	160.964	110	163.204	110
	111	64.652	111	65.304	111	65.431	64.652	65.304	65.431	111	65.129	111	92.745	111	92.769	111	93.047	92.745	92.769	93.047	111	92.8537	111	93.861	111	93.899	111	94.073	93.861	93.899	94.073	111	93.9443	111	108.671	111	108.43	111	108.418	108.671	108.43	108.418	111	108.506	111	141.935	111	143.544	111
	112	64.998	112	64.667	112	64.53	64.998	64.667	64.53	112	64.7317	112	92.649	112	92.638	112	92.505	92.649	92.638	92.505	112	92.5973	112	93.005	112	93.005	112	93.005	93.005	93.005	93.005	112	93.005	112	108.355	112	108.229	112	108.223	108.355	108.229	108.223	112	108.269	112	144.085	112	143.823	112
	113	65.993	113	64.998	113	64.995	65.993	64.998	64.995	113	65.3287	113	90.447	113	90.421	113	90.11	90.447	90.421	90.11	113	90.326	113	90.912	113	90.882	113	90.74	90.912	90.882	90.74	113	90.8447	113	133.856	113	133.939	113	133.943	133.856	133.939	133.943	113	133.913	113	166.582	113	164.354	113
	114	64.563	114	65.994	114	65.989	64.563	65.994	65.989	114	65.5153	114	89.988	114	90.04	114	90.663	89.988	90.04	90.663	114	90.2303	114	96.506	114	96.557	114	96.79	96.506	96.557	96.79	114	96.6177	114	142.946	114	142.977	114	142.978	142.946	142.977	142.978	114	142.967	114	173.792	114	170.856	114
	115	64.52	115	64.588	115	64.42	64.52	64.588	64.42	115	64.5093	115	90.74	115	90.798	115	91.489	90.74	90.798	91.489	115	91.009	115	97.507	115	97.491	115	97.416	97.507	97.491	97.416	115	97.4713	115	144.87	115	144.567	115	144.551	144.87	144.567	144.551	115	144.663	115	173.977	115	174.189	115
	116	65.503	116	64.552	116	64.361	65.503	64.552	64.361	116	64.8053	116	90.146	116	90.162	116	90.348	90.146	90.162	90.348	116	90.2187	116	98.098	116	98.061	116	97.894	98.098	98.061	97.894	116	98.0177	116	147.453	116	147.297	116	147.289	147.453	147.297	147.289	116	147.346	116	166.319	116	169.983	116
	117	65.005	117	65.47	117	65.661	65.005	65.47	65.661	117	65.3787	117	88.212	117	88.243	117	88.61	88.212	88.243	88.61	117	88.355	117	94.962	117	94.863	117	94.406	94.962	94.863	94.406	117	94.7437	117	137.081	117	139.843	117	139.985	137.081	139.843	139.985	117	138.97	117	127.474	117	131.81	117
	118	65	118	65.004	118	65.01	65	65.004	65.01	118	65.0047	118	87.083	118	87.117	118	87.517	87.083	87.117	87.517	118	87.239	118	96.604	118	96.584	118	96.49	96.604	96.584	96.49	118	96.5593	118	121.824	118	123.624	118	123.717	121.824	123.624	123.717	118	123.055	118	121.386	118	122.114	118
	119	65.602	119	65	119	65	65.602	65	65	119	65.2007	119	89.892	119	89.913	119	90.163	89.892	89.913	90.163	119	89.9893	119	98.291	119	98.249	119	98.054	98.291	98.249	98.054	119	98.198	119	134.04	119	131.951	119	131.842	134.04	131.951	131.842	119	132.611	119	158.912	119	156.061	119
	120	65.007	120	65.556	120	65.787	65.007	65.556	65.787	120	65.45	120	91.862	120	91.883	120	91.804	91.862	91.883	91.804	120	91.8497	120	100.048	120	99.98	120	99.669	100.048	99.98	99.669	120	99.899	120	150.215	120	149.461	120	149.422	150.215	149.461	149.422	120	149.699	120	173.005	120	170.835	120
	121	65	121	65.005	121	65.014	65	65.005	65.014	121	65.0063	121	90.187	121	90.166	121	89.911	90.187	90.166	89.911	121	90.088	121	99.729	121	99.704	121	99.59	99.729	99.704	99.59	121	99.6743	121	170.202	121	170.52	121	170.535	170.202	170.52	170.535	121	170.419	121	177.756	121	177.295	121
	122	65	122	65	122	65	65	65	65	122	65	122	90.732	122	90.651	122	89.916	90.732	90.651	89.916	122	90.433	122	102.242	122	102.169	122	101.83	102.242	102.169	101.83	122	102.08	122	170.062	122	170.742	122	170.777	170.062	170.742	170.777	122	170.527	122	179.819	122	179.858	122
	123	64.739	123	65	123	65	64.739	65	65	123	64.913	123	91.199	123	91.09	123	89.999	91.199	91.09	89.999	123	90.7627	123	112.855	123	112.863	123	112.9	112.855	112.863	112.9	123	112.873	123	168.981	123	169.69	123	169.726	168.981	169.69	169.726	123	169.466	123	183.735	123	183.543	123
	124	64.997	124	64.676	124	64.96	64.997	64.676	64.96	124	64.8777	124	89.262	124	89.167	124	88.045	89.262	89.167	88.045	124	88.8247	124	120.412	124	120.5	124	120.907	120.412	120.5	120.907	124	120.606	124	171.561	124	172.075	124	172.101	171.561	172.075	172.101	124	171.912	124	181.102	124	180.233	124
	125	66.777	125	64.997	125	65	66.777	64.997	65	125	65.5913	125	90.268	125	90.312	125	90.859	90.268	90.312	90.859	125	90.4797	125	128.297	125	128.39	125	128.819	128.297	128.39	128.819	125	128.502	125	167.633	125	169.157	125	169.235	167.633	169.157	169.235	125	168.675	125	183.387	125	181.32	125
	126	65.024	126	66.711	126	66.92	65.024	66.711	66.92	126	66.2183	126	92.117	126	92.17	126	92.79	92.117	92.17	92.79	126	92.359	126	141.111	126	141.214	126	141.681	141.111	141.214	141.681	126	141.335	126	165.317	126	164.507	126	164.465	165.317	164.507	164.465	126	164.763	126	198.527	126	195.779	126
	127	65	127	65.019	127	65.196	65	65.019	65.196	127	65.0717	127	91.482	127	91.458	127	91.162	91.482	91.458	91.162	127	91.3673	127	142.466	127	142.682	127	143.682	142.466	142.682	143.682	127	142.943	127	190.09	127	189.42	127	189.384	190.09	189.42	189.384	127	189.631	127	206.831	127	202.277	127
	128	65.986	128	65	128	65.122	65.986	65	65.122	128	65.3693	128	92.47	128	92.445	128	92.141	92.47	92.445	92.141	128	92.352	128	158.825	128	158.942	128	159.468	158.825	158.942	159.468	128	159.078	128	202.674	128	202.468	128	202.456	202.674	202.468	202.456	128	202.533	128	199.41	128	196.175	128
	129	65.015	129	65.989	129	65.825	65.015	65.989	65.825	129	65.6097	129	94.897	129	94.9	129	94.93	94.897	94.9	94.93	129	94.909	129	164.895	129	164.805	129	164.383	164.895	164.805	164.383	129	164.694	129	207.499	129	206.635	129	206.591	207.499	206.635	206.591	129	206.908	129	198.154	129	197.183	129
	130	65	130	65.012	130	64.825	65	65.012	64.825	130	64.9457	130	95.956	130	95.958	130	95.974	95.956	95.958	95.974	130	95.9627	130	170.923	130	170.9	130	170.766	170.923	170.9	170.766	130	170.863	130	193.306	130	193.501	130	193.513	193.306	193.501	193.513	130	193.44	130	208.047	130	205.874	130
	131	65	131	65	131	64.761	65	65	64.761	131	64.9203	131	95.357	131	95.384	131	95.717	95.357	95.384	95.717	131	95.486	131	168.191	131	168.117	131	168.553	168.191	168.117	168.553	131	168.287	131	188.068	131	188.03	131	188.029	188.068	188.03	188.029	131	188.042	131	214.652	131	214.787	131
	132	65	132	65	132	64.721	65	65	64.721	132	64.907	132	95.966	132	95.969	132	95.991	95.966	95.969	95.991	132	95.9753	132	167.802	132	167.873	132	169.737	167.802	167.873	169.737	132	168.471	132	196.123	132	197.507	132	197.577	196.123	197.507	197.577	132	197.069	132	217.732	132	221.241	132
	133	65	133	65	133	64.992	65	65	64.992	133	64.9973	133	97.904	133	97.907	133	97.943	97.904	97.907	97.943	133	97.918	133	183.45	133	183.807	133	186.873	183.45	183.807	186.873	133	184.71	133	207.021	133	209.159	133	209.267	207.021	209.159	209.267	133	208.482	133	218.859	133	222.687	133
	134	65.983	134	65.046	134	65	65.983	65.046	65	134	65.343	134	111.776	134	111.894	134	113.289	111.776	111.894	113.289	134	112.32	134	187.572	134	187.66	134	189.279	187.572	187.66	189.279	134	188.17	134	208.973	134	210.752	134	210.843	208.973	210.752	210.843	134	210.189	134	220.977	134	222.355	134
	135	64.27	135	65.987	135	65.972	64.27	65.987	65.972	135	65.4097	135	135.003	135	135.114	135	136.374	135.003	135.114	136.374	135	135.497	135	190.152	135	190.117	135	190.732	190.152	190.117	190.732	135	190.334	135	209.838	135	210.999	135	211.11	209.838	210.999	211.11	135	210.649	135	223.383	135	219.914	135
	136	64.154	136	64.046	136	64.91	64.154	64.046	64.91	136	64.37	136	138.063	136	138.168	136	139.426	138.063	138.168	139.426	136	138.552	136	195.678	136	195.887	136	196.857	195.678	195.887	196.857	136	196.141	136	218.166	136	219.147	136	219.283	218.166	219.147	219.283	136	218.865	136	219.136	136	212.976	136
	137	65.966	137	64.038	137	64.493	65.966	64.038	64.493	137	64.8323	137	146.526	137	146.682	137	148.535	146.526	146.682	148.535	137	147.248	137	198.853	137	198.571	137	197.252	198.853	198.571	197.252	137	198.225	137	223.764	137	222.86	137	222.921	223.764	222.86	222.921	137	223.182	137	206.169	137	200.278	137
	138	66	138	65.971	138	65.955	66	65.971	65.955	138	65.9753	138	170.139	138	170.525	138	173.657	170.139	170.525	173.657	138	171.44	138	207.964	138	207.672	138	206.321	207.964	207.672	206.321	138	207.319	138	220.242	138	217.929	138	217.847	220.242	217.929	217.847	138	218.673	138	197.059	138	191.624	138
	139	65.515	139	66	139	66	65.515	66	66	139	65.8383	139	179.438	139	179.827	139	183.682	179.438	179.827	183.682	139	180.982	139	217.504	139	217.293	139	216.315	217.504	217.293	216.315	139	217.037	139	220.466	139	216.438	139	216.232	220.466	216.438	216.232	139	217.712	139	192.089	139	193.709	139
	140	65.009	140	65.762	140	64.841	65.009	65.762	64.841	140	65.204	140	188.827	140	189.228	140	194.301	188.827	189.228	194.301	140	190.785	140	217.997	140	217.993	140	217.978	217.997	217.993	217.978	140	217.989	140	219.14	140	213.213	140	212.874	219.14	213.213	212.874	140	215.076	140	176.07	140	184.964	140
	141	65	141	65.011	141	64.991	65	65.011	64.991	141	65.0007	141	209.077	141	209.255	141	211.817	209.077	209.255	211.817	141	210.05	141	217.874	141	218.333	141	220.469	217.874	218.333	220.469	141	218.892	141	218.684	141	213.371	141	213.11	218.684	213.371	213.11	141	215.055	141	155.259	141	168.671	141
	142	65	142	65	142	65	65	65	65	142	65	142	211.575	142	211.774	142	214.427	211.575	211.774	214.427	142	212.592	142	211.676	142	212.148	142	214.328	211.676	212.148	214.328	142	212.717	142	186.873	142	178.072	142	177.923	186.873	178.072	177.923	142	180.956	142	170.171	142	181.459	142
	143	64.022	143	65	143	65	64.022	65	65	143	64.674	143	216.522	143	217.162	143	222.52	216.522	217.162	222.52	143	218.735	143	206.274	143	206.662	143	208.453	206.274	206.662	208.453	143	207.13	143	150.654	143	145.171	143	145.02	150.654	145.171	145.02	143	146.948	143	209.388	143	214.114	143
	144	63.602	144	64.017	144	64.035	63.602	64.017	64.035	144	63.8847	144	221.149	144	221.989	144	228.111	221.149	221.989	228.111	144	223.75	144	137.635	144	138.116	144	140.394	137.635	138.116	140.394	144	138.715	144	169.925	144	176.851	144	177.164	169.925	176.851	177.164	144	174.647	144	230.676	144	235.123	144
	145	63.013	145	63.743	145	63.23	63.013	63.743	63.23	145	63.3287	145	223.358	145	224.303	145	232.094	223.358	224.303	232.094	145	226.585	145	110.283	145	110.656	145	112.387	110.283	110.656	112.387	145	111.109	145	207.666	145	211.572	145	211.732	207.666	211.572	211.732	145	210.323	145	244.619	145	248.388	145
	146	63.976	146	63.013	146	63.006	63.976	63.013	63.006	146	63.3317	146	192.907	146	194.78	146	215.001	192.907	194.78	215.001	146	200.896	146	200.534	146	200.353	146	199.41	200.534	200.353	199.41	146	200.099	146	226.85	146	224.75	146	225.119	226.85	224.75	225.119	146	225.573	146	233.297	146	227.95	146
	147	64.485	147	63.982	147	63.962	64.485	63.982	63.962	147	64.143	147	146.8	147	148.251	147	164.687	146.8	148.251	164.687	147	153.246	147	235.417	147	235.1	147	233.611	235.417	235.1	233.611	147	234.709	147	248.565	147	249.416	147	249.579	248.565	249.416	249.579	147	249.187	147	111.015	147	111.83	147
	148	63.036	148	64.642	148	64.078	63.036	64.642	64.078	148	63.9187	148	137.81	148	138.373	148	144.745	137.81	138.373	144.745	148	140.309	148	252.459	148	252.158	148	250.758	252.459	252.158	250.758	148	251.792	148	179.145	148	190.092	148	189.939	179.145	190.092	189.939	148	186.392	148	3.806	148	1.866	148
	149	64.659	149	63.031	149	63.041	64.659	63.031	63.041	149	63.577	149	223.852	149	223.209	149	214.683	223.852	223.209	214.683	149	220.581	149	254.946	149	254.94	149	254.928	254.946	254.94	254.928	149	254.938	149	53.151	149	55.471	149	55.506	53.151	55.471	55.506	149	54.7093	149	0	149	0	149
	150	70.257	150	64.18	150	65.876	70.257	64.18	65.876	150	66.771	150	249.39	150	248.748	150	241.126	249.39	248.748	241.126	150	246.421	150	255	150	255	150	255	255	255	255	150	255	150	1.086	150	0.491	150	0.465	1.086	0.491	0.465	150	0.680667	150	0	150	0	150
	151	43.714	151	70.445	151	69.877	43.714	70.445	69.877	151	61.3453	151	252.683	151	252.231	151	246.915	252.683	252.231	246.915	151	250.61	151	78.866	151	79.529	151	82.792	78.866	79.529	82.792	151	80.3957	151	0.488	151	0	151	0	0.488	0	0	151	0.162667	151	0	151	0	151
	152	18.983	152	43.563	152	43.825	18.983	43.563	43.825	152	35.457	152	254.868	152	254.84	152	254.661	254.868	254.84	254.661	152	254.79	152	3.014	152	2.842	152	2.057	3.014	2.842	2.057	152	2.63767	152	0.012	152	0	152	0	0.012	0	0	152	0.004	152	0	152	0	152
	153	0.499	153	18.492	153	19.543	0.499	18.492	19.543	153	12.8447	153	254.229	153	253.946	153	250.457	254.229	253.946	250.457	153	252.877	153	0.026	153	0.023	153	0.01	0.026	0.023	0.01	153	0.0196667	153	0	153	0	153	0	0	0	0	153	0	153	0.699	153	0.388	153
	154	0	154	0.382	154	0.792	0	0.382	0.792	154	0.391333	154	25.29	154	25.532	154	29.874	25.29	25.532	29.874	154	26.8987	154	0	154	0	154	0	0	0	0	154	0	154	0	154	0	154	0	0	0	0	154	0	154	1.171	154	0.59	154
	155	0	155	0	155	0	0	0	0	155	0	155	0.371	155	0.439	155	0.868	0.371	0.439	0.868	155	0.559333	155	0	155	0	155	0	0	0	0	155	0	155	0	155	0	155	0	0	0	0	155	0	155	0	155	0	155
	156	0	156	0	156	0	0	0	0	156	0	156	0	156	0	156	0	0	0	0	156	0	156	0	156	0	156	0	0	0	0	156	0	156	0	156	0	156	0	0	0	0	156	0	156	0	156	0	156
	157	0	157	0	157	0	0	0	0	157	0	157	0	157	0	157	0	0	0	0	157	0	157	0	157	0	157	0	0	0	0	157	0	157	0	157	0	157	0	0	0	0	157	0	157	0	157	0.064	157
	158	0	158	0	158	0	0	0	0	158	0	158	0	158	0	158	0	0	0	0	158	0	158	0	158	0	158	0	0	0	0	158	0	158	0.575	158	1.772	158	1.834	0.575	1.772	1.834	158	1.39367	158	0.724	158	0.53	158
	159	0	159	0	159	0	0	0	0	159	0	159	0	159	0	159	0	0	0	0	159	0	159	0.965	159	0.934	159	0.638	0.965	0.934	0.638	159	0.845667	159	0.014	159	0.019	159	0.018	0.014	0.019	0.018	159	0.017	159	1.298	159	1.495	159
	160	0	160	0	160	0	0	0	0	160	0	160	0	160	0	160	0	0	0	0	160	0	160	0.036	160	0.034	160	0.327	0.036	0.034	0.327	160	0.132333	160	0	160	0	160	0	0	0	0	160	0	160	0	160	0	160
	161	0	161	0	161	0	0	0	0	161	0	161	0	161	0	161	0	0	0	0	161	0	161	1.731	161	1.87	161	2.242	1.731	1.87	2.242	161	1.94767	161	0	161	0	161	0	0	0	0	161	0	161	0	161	0	161
	162	0	162	0	162	0	0	0	0	162	0	162	0.315	162	0.262	162	0	0.315	0.262	0	162	0.192333	162	0.327	162	0.191	162	0.055	0.327	0.191	0.055	162	0.191	162	0.801	162	0.179	162	0.146	0.801	0.179	0.146	162	0.375333	162	0	162	0	162
	163	0	163	0	163	0	0	0	0	163	0	163	0.4	163	0.34	163	0	0.4	0.34	0	163	0.246667	163	0.342	163	0.198	163	0	0.342	0.198	0	163	0.18	163	0.023	163	0.002	163	0.002	0.023	0.002	0.002	163	0.009	163	0	163	0	163
	164	0	164	0	164	0	0	0	0	164	0	164	0.454	164	0.393	164	0	0.454	0.393	0	164	0.282333	164	0.016	164	0.009	164	0	0.016	0.009	0	164	0.00833333	164	0	164	0	164	0	0	0	0	164	0	164	0	164	0	164
	165	0	165	0	165	0	0	0	0	165	0	165	0.508	165	0.446	165	0	0.508	0.446	0	165	0.318	165	0	165	0	165	0	0	0	0	165	0	165	0	165	0	165	0	0	0	0	165	0	165	0	165	0	165
	166	0	166	0	166	0	0	0	0	166	0	166	0.054	166	0.046	166	0	0.054	0.046	0	166	0.0333333	166	0	166	0	166	0	0	0	0	166	0	166	0	166	0	166	0	0	0	0	166	0	166	0	166	0	166
	167	0	167	0	167	0	0	0	0	167	0	167	0	167	0	167	0	0	0	0	167	0	167	0	167	0	167	0	0	0	0	167	0	167	0	167	0	167	0	0	0	0	167	0	167	0	167	0	167
	168	0	168	0	168	0	0	0	0	168	0	168	0	168	0	168	0	0	0	0	168	0	168	0	168	0	168	0	0	0	0	168	0	168	0	168	0	168	0	0	0	0	168	0	168	0	168	0	168
	169	0	169	0	169	0	0	0	0	169	0	169	0	169	0	169	0	0	0	0	169	0	169	0	169	0	169	0	0	0	0	169	0	169	0	169	0	169	0	0	0	0	169	0	169	0	169	0	169
	170	0	170	0	170	0	0	0	0	170	0	170	0	170	0	170	0	0	0	0	170	0	170	0.395	170	0.319	170	0	0.395	0.319	0	170	0.238	170	0	170	0	170	0	0	0	0	170	0	170	0	170	0	170
	171	0	171	0	171	0	0	0	0	171	0	171	0	171	0	171	0	0	0	0	171	0	171	0.019	171	0.014	171	0	0.019	0.014	0	171	0.011	171	0	171	0	171	0	0	0	0	171	0	171	0	171	0	171
	172	0	172	0	172	0	0	0	0	172	0	172	0	172	0	172	0	0	0	0	172	0	172	0	172	0	172	0	0	0	0	172	0	172	0	172	0	172	0	0	0	0	172	0	172	0	172	0	172
	173	0	173	0	173	0	0	0	0	173	0	173	0	173	0	173	0	0	0	0	173	0	173	0	173	0	173	0	0	0	0	173	0	173	0	173	0	173	0	0	0	0	173	0	173	0	173	0	173
	174	0	174	0	174	0	0	0	0	174	0	174	0	174	0	174	0	0	0	0	174	0	174	0	174	0	174	0	0	0	0	174	0	174	0	174	0	174	0	0	0	0	174	0	174	0	174	0	174
	175	0	175	0	175	0	0	0	0	175	0	175	0	175	0	175	0	0	0	0	175	0	175	0	175	0	175	0	0	0	0	175	0	175	0	175	0	175	0	0	0	0	175	0	175	0	175	0	175
	176	0	176	0	176	0	0	0	0	176	0	176	0	176	0	176	0	0	0	0	176	0	176	0	176	0	176	0	0	0	0	176	0	176	0	176	0	176	0	0	0	0	176	0	176	0	176	0	176
	177	0	177	0	177	0	0	0	0	177	0	177	0	177	0	177	0	0	0	0	177	0	177	0	177	0	177	0	0	0	0	177	0	177	0	177	0	177	0	0	0	0	177	0	177	0	177	0	177
	178	0	178	0	178	0	0	0	0	178	0	178	0	178	0	178	0	0	0	0	178	0	178	0	178	0	178	0	0	0	0	178	0	178	0	178	0	178	0	0	0	0	178	0	178	0	178	0	178
	179	0	179	0	179	0	0	0	0	179	0	179	0	179	0	179	0	0	0	0	179	0	179	0	179	0	179	0	0	0	0	179	0	179	0	179	0	179	0	0	0	0	179	0	179	0	179	0	179
	180	0	180	0	180	0	0	0	0	180	0	180	0	180	0	180	0	0	0	0	180	0	180	0	180	0	180	0	0	0	0	180	0	180	0	180	0	180	0	0	0	0	180	0	180	0	180	0	180
	181	0	181	0	181	0	0	0	0	181	0	181	0	181	0	181	0	0	0	0	181	0	181	0	181	0	181	0	0	0	0	181	0	181	0	181	0	181	0	0	0	0	181	0	181	0	181	0	181
	182	0	182	0	182	0	0	0	0	182	0	182	0	182	0	182	0	0	0	0	182	0	182	0	182	0	182	0	0	0	0	182	0	182	0	182	0	182	0	0	0	0	182	0	182	0	182	0	182
	183	0	183	0	183	0	0	0	0	183	0	183	0	183	0	183	0	0	0	0	183	0	183	0	183	0	183	0	0	0	0	183	0	183	0	183	0	183	0	0	0	0	183	0	183	0	183	0	183
	184	0	184	0	184	0	0	0	0	184	0	184	0	184	0	184	0	0	0	0	184	0	184	0	184	0	184	0	0	0	0	184	0	184	0	184	0	184	0	0	0	0	184	0	184	0	184	0	184
	185	0	185	0	185	0	0	0	0	185	0	185	0	185	0	185	0	0	0	0	185	0	185	0	185	0	185	0	0	0	0	185	0	185	0	185	0	185	0	0	0	0	185	0	185	0	185	0	185
	186	0	186	0	186	0	0	0	0	186	0	186	0	186	0	186	0	0	0	0	186	0	186	0	186	0	186	0	0	0	0	186	0	186	0	186	0	186	0	0	0	0	186	0	186	0	186	0	186
	187	0	187	0	187	0	0	0	0	187	0	187	0	187	0	187	0	0	0	0	187	0	187	0	187	0	187	0	0	0	0	187	0	187	0	187	0	187	0	0	0	0	187	0	187	0	187	0	187
	188	0	188	0	188	0	0	0	0	188	0	188	0	188	0	188	0	0	0	0	188	0	188	0	188	0	188	0	0	0	0	188	0	188	0	188	0	188	0	0	0	0	188	0	188	0	188	0	188
	189	0	189	0	189	0	0	0	0	189	0	189	0	189	0	189	0	0	0	0	189	0	189	0	189	0	189	0	0	0	0	189	0	189	0	189	0	189	0	0	0	0	189	0	189	0	189	0	189
	190	0	190	0	190	0	0	0	0	190	0	190	0	190	0	190	0	0	0	0	190	0	190	0	190	0	190	0	0	0	0	190	0	190	0	190	0	190	0	0	0	0	190	0	190	0	190	0	190
	191	0	191	0	191	0	0	0	0	191	0	191	0	191	0	191	0	0	0	0	191	0	191	0	191	0	191	0	0	0	0	191	0	191	0	191	0	191	0	0	0	0	191	0	191	0	191	0	191
	192	0	192	0	192	0	0	0	0	192	0	192	0	192	0	192	0	0	0	0	192	0	192	0	192	0	192	0	0	0	0	192	0	192	0	192	0	192	0	0	0	0	192	0	192	0	192	0	192
	193	0	193	0	193	0	0	0	0	193	0	193	0	193	0	193	0	0	0	0	193	0	193	0	193	0	193	0	0	0	0	193	0	193	0	193	0	193	0	0	0	0	193	0	193	0	193	0	193
	194	0	194	0	194	0	0	0	0	194	0	194	0	194	0	194	0	0	0	0	194	0	194	0	194	0	194	0	0	0	0	194	0	194	0	194	0	194	0	0	0	0	194	0	194	0	194	0	194
	195	0	195	0	195	0	0	0	0	195	0	195	0	195	0	195	0	0	0	0	195	0	195	0	195	0	195	0	0	0	0	195	0	195	0	195	0	195	0	0	0	0	195	0	195	0	195	0	195
	196	0	196	0	196	0	0	0	0	196	0	196	0	196	0	196	0	0	0	0	196	0	196	0	196	0	196	0	0	0	0	196	0	196	0	196	0	196	0	0	0	0	196	0	196	0	196	0	196
	197	0	197	0	197	0	0	0	0	197	0	197	0	197	0	197	0	0	0	0	197	0	197	0	197	0	197	0	0	0	0	197	0	197	0	197	0	197	0	0	0	0	197	0	197	0	197	0	197
	198	0	198	0	198	0	0	0	0	198	0	198	0	198	0	198	0	0	0	0	198	0	198	0	198	0	198	0	0	0	0	198	0	198	0	198	0	198	0	0	0	0	198	0	198	0	198	0	198
	199	0	199	0	199	0	0	0	0	199	0	199	0	199	0	199	0	0		0	199	0	199	0	199	0	199	0	0	0	0	199	0	199	0	199	0	199	0	0	0	0	199	0	199	0	199	0	199
	200	0	200	0	200	0	0	0	0	200	0	200	0	200	0	200	0	0		0	200	0	200	0	200	0	200	0	0	0	0	200	0	200	0	200	0	200	0	0	0	0	200	0	200	0	200	0	200
[truncated: 50 more columns]

## Sheet: Figure 3
Day	Mean Hounsfield Unit
0	68.0201
7	115.927
14	128.515
21	140.026
28	155.614
35	167.428
42	166.751
49	168.05
56	167.725

## Sheet: Figure 4
Day	Volume (mm3)
0	28479.1
7	26747.4
14	26181.5
21	25320.3
28	24594.8
35	24148.8
42	23980.2
49	23383.7
56	23294.7

## Sheet: Figure 6 
MUTV2C				MUTV2A				MUTV2DVR				MUTV2DC				MUTV2IC				MUTV2SFI
X	Day 0	Day 28	Day 56		Day 0	Day 28	Day 56	X	Day 0	Day 28	Day 56	X	Day 0	Day 28	Day 56	X	Day 0	Day 28	Day 56	X	Day 0	Day 28	Day 56
0	0	0	0	0	0	0	0	0	0	0	0	0	0	0	0	0	0	0	0	0	0	0	0
1	0	0	0	1	0	0	0	1	0	0	0	1	0	0	0	1	0	0	0	1	0	0	0
2	0	0	0	2	0	1.674	0	2	0	0	0	2	0	0	0	2	0	0	0	2	0	0	0
3	0	0	0	3	0	2.124	0	3	0	0	0	3	0	0	0	3	0	0	0	3	0	0	0
4	0	0	0	4	0	0.377	0	4	0	0	0	4	0	0	0	4	0	0	0	4	0	0	0
5	0	0	0	5	0	0	0	5	0	0	0	5	0	0	0	5	0	0	0	5	0	0	0
6	0	0	0	6	0	0.822	0	6	0	0	0	6	0	0	0	6	0	0	0	6	0	0	0
7	0	0	0	7	0	1.072	0	7	0	0	0	7	0	0	0	7	0	0	0	7	0	0	0
8	0	0	0	8	0	1.679	0	8	0	0	0	8	0	0	0	8	0	0	0	8	0	0	0
9	0	0	0	9	0	2.629	0	9	0	0	0	9	0	0	0	9	0	0	0	9	0	0	0
10	0	0	0	10	0	0.053	0	10	0	0	0	10	0	0	0	10	0	0	0	10	0	0	0
11	0	0	0	11	0	0.502	1.409	11	0	0	0	11	0	0	0	11	0	0	0	11	0	0	0
12	0	0	0	12	0	1.611	2.685	12	0	0	0	12	0	0	0	12	0	0	0	12	0	0	0
13	0	0	0	13	0	1.085	2.946	13	0	0	0	13	0	0	0	13	0	0	0	13	0.122	0	0
14	0	0	72	14	0	0.734	2.104	14	0	0	0	14	0	0	0	14	0	0	0	14	0.681	0	0
15	0	0	159	15	0	0.216	0.579	15	0	0	0	15	0	0	0	15	0	0	0	15	0.768	0	0
16	0	0	242	16	0	0.231	0	16	0	0	0	16	0	0	0	16	0	0	0	16	0	0	0
17	0	0	241	17	0	1.244	0	17	0	0	0	17	0	0	0	17	0	0	0	17	0	0	0
18	23	0	221	18	0	3.933	0	18	0	0	0	18	0	0	0	18	0	0	0	18	0	0	0
19	50	0	213	19	0	2.214	0	19	0	0	0	19	0	0	0	19	0	0	0	19	0	0	0
20	73	0	204	20	0	0.628	0	20	0	0	0	20	0	0	0	20	0	0	0	20	0	0	0
21	73	0	203	21	0	3.086	0	21	0	0	0	21	0	0	0	21	0	0	0	21	0	0	0
22	72	0	204	22	0	5.183	0.399	22	0	0	0	22	0	0	0	22	0	0	0	22	0	0	0
23	70	139	206	23	0	7.057	0.998	23	0	0	0	23	0	0	0	23	0	0	0	23	0	0	0
24	72	244	211	24	0	6.839	0.803	24	0	0	0	24	0	0	0	24	0	0	0	24	0	0	0
25	71	219	210	25	0	4.742	0.608	25	0	0	0	25	0	0	0	25	0	0	0	25	0	0	0
26	71	212	204	26	0	4.137	0.586	26	0	0	0	26	0	0	0	26	0	0	0	26	0	0	0
27	71	202	202	27	0	4.143	0.35	27	0	0	0	27	0	0	0	27	0	0	0	27	1.864	0	0
28	72	203	196	28	0	3.476	0.015	28	0	0	0	28	0	0	0	28	0	0	0	28	24.546	0	0
29	72	199	194	29	0	2.849	0	29	0	0	0	29	0	0	0	29	0	0	0	29	56.208	0	0
30	72	197	197	30	0	4.138	0.341	30	0	0	0	30	0	0	0	30	0	0	0	30	50.352	0	0
31	72	195	198	31	0	5.001	1.141	31	0	0	0	31	0	0	0	31	0	0	0	31	22.115	0	1.346
32	71	191	198	32	0	5.153	1.171	32	0	0	0	32	0	0	0	32	0	0	0	32	3.786	0	25.86
33	71	185	186	33	0	6.208	0.717	33	0	0	0	33	0	0	0	33	0	0	0	33	0	0	147.704
34	72	181	161	34	0	7.812	0	34	0	0	0	34	0	0	0	34	0	0	0	34	2.132	0	213.212
35	73	197	107	35	0	7.201	0.162	35	0	0	0	35	0	0	0	35	0	0	0	35	28.683	0.361	194.208
36	72	194	98	36	0	6.382	0.692	36	0	0	0	36	0	0	0	36	0	0	0	36	70.344	12.403	147.931
37	72	193	145	37	0	9.267	1.422	37	0	0	0	37	0	0	0	37	0	0	0	37	77.282	97.372	194.578
38	72	195	174	38	0	12.469	2.029	38	0	0	0	38	0	0	0	38	0	0	0	38	67.791	162.803	233.877
39	72	192	193	39	0	15.25	2.287	39	0	0	0	39	0	0	0	39	0	0	0	39	71.636	166.407	239.74
40	70	170	189	40	0	15.485	4.059	40	0	0	0	40	0	0	0	40	0	0	0	40	72.165	151.237	236.205
41	72	157	186	41	0	16.219	9.354	41	0	0	0	41	0	0	0	41	0	0	0	41	68.096	155.326	229.427
42	74	142	186	42	0	18.112	15.627	42	0	0	0	42	0	0	0	42	0	0	0	42	69.903	172.657	209.3
43	72	188	183	43	0	19.515	17.979	43	0	0	0	43	0	0	0	43	0	0	0	43	76.152	195.197	182.961
44	71	201	178	44	45	26.088	20.244	44	0	0	0	44	0	0	0	44	0	87.076	0	44	70.552	221.269	186.201
45	71	194	175	45	72	29.691	22.903	45	0	0	0	45	0	0	0	45	0	225.889	85.783	45	66.75	226.07	195.906
46	72	188	173	46	76	27.753	31.253	46	0	0	0	46	0	0	0	46	0	255	219.954	46	67.903	222.82	192.461
47	73	184	173	47	73	53.173	74.667	47	0	0	0	47	0	0	0	47	0	255	255	47	67.058	225.594	194.498
48	72	177	169	48	68	97.683	152.738	48	0	0	0	48	0	0	0	48	0	255	255	48	69.813	226.529	176.231
49	72	171	158	49	70	118.999	193.282	49	0	0	0	49	0	0	0	49	0	255	255	49	72.444	208.659	149.983
50	72	154	154	50	70	141.226	219.587	50	0	0	0	50	0	0	0	50	0	255	255	50	71.13	158.283	135.12
51	71	157	154	51	71	185.791	219.003	51	0	0	0	51	0	0	0	51	0	255	255	51	76.909	131.258	111.741
52	72	166	151	52	71	196.848	209.49	52	0	0	0	52	0	0	0	52	0	255	255	52	70.549	148.703	107.864
53	72	164	140	53	71	179.023	201.141	53	0	0	0	53	0	0	0	53	0	255	255	53	68.249	174.462	135.383
54	72	154	140	54	72	173.007	200.159	54	0	0	0	54	0	0	0	54	0.343	255	255	54	73.837	190.772	148.424
55	71	155	144	55	72	175.707	194.861	55	0	0	0	55	0	0	0	55	56.295	249.944	254.724	55	73.944	200.234	147.892
56	72	161	145	56	73	184.097	179.792	56	0	0	0	56	0	0	0	56	77.285	245.976	235.642	56	69.147	199.605	168.839
57	73	161	142	57	72	184.962	169.339	57	0	0	0	57	0	0	0	57	76.08	254.94	212.328	57	70.209	191.642	198.598
58	72	157	140	58	72	173.285	173.651	58	0	0	0	58	0	0	0	58	72.987	254.951	231.834	58	74.272	177.067	207.472
59	72	157	137	59	73	172.348	195.346	59	0	0	0	59	0	0	0	59	70.665	255	247.812	59	70.753	164.429	218.039
60	71	155	136	60	71	200.293	206.725	60	2.65	0	0	60	0	0	0	60	70.351	255	252.409	60	67.34	161.151	238.861
61	72	156	137	61	71	220.421	212.345	61	21.924	0	0	61	0	0	0	61	70.639	254.394	249.697	61	69.796	170.32	230.869
62	71	154	137	62	72	212.654	211.924	62	68.341	0	0	62	0	0	0	62	71.608	252.893	250.103	62	71.835	182.434	213.97
63	71	146	139	63	72	210.393	203.938	63	74.093	0	0	63	0	0	0	63	69.606	252.253	244.614	63	71.141	186.221	199.59
64	71	128	137	64	72	191.669	192.484	64	70.963	0	0	64	0	0	0	64	70.587	252.774	244.845	64	72.079	185.8	196.235
65	72	114	135	65	71	188.612	188.451	65	70.582	32.65	0	65	0	0	0	65	70.997	253.397	240.433	65	74.172	191.298	206.097
66	73	98	137	66	70	182.318	187.632	66	70.545	148.846	7.506	66	0	0	0	66	70.457	252.133	232.538	66	70.313	206.946	209.688
67	73	100	132	67	72	183.074	186.864	67	71.474	233.249	86.339	67	0	0	0	67	72.53	245.362	241.976	67	72.265	211.844	198.549
68	74	112	129	68	72	185.237	184.901	68	73.246	219.475	171.037	68	0.000119	0	0	68	71	251.032	253.875	68	71.559	198.445	189.319
69	74	125	123	69	73	183.26	180.26	69	72.111	192.122	185.092	69	0.503	0	0	69	71.002	255	254.949	69	72.253	181.128	191.416
70	74	127	116	70	72	178.416	177.577	70	72.201	193.621	179.064	70	0.316	0	0	70	71.512	255	253.832	70	72.347	176.537	210.665
71	74	139	113	71	75	171.891	177.844	71	72	205.748	187.082	71	0	0	0	71	71.468	253.091	251.535	71	75.189	187.368	198.206
72	74	132	115	72	74	171.831	176.391	72	72.575	213.022	185.685	72	0	0	0	72	70.548	247.843	244.827	72	67.498	198.134	187.51
73	72	125	131	73	74	151.757	173.698	73	73.574	211.413	187.064	73	0	0	0	73	71.441	255	232.284	73	67.823	200.717	199.468
74	72	119	139	74	73	145.457	172.31	74	72.907	203.923	189.06	74	0	0.309	4.684	74	72	255	239.038	74	67.995	204.483	193.247
75	73	118	142	75	72	165.243	171.377	75	71.469	194.154	188.311	75	0	24.584	36.77	75	72.001	254.956	234.706	75	75.225	211.024	159.717
76	72	115	142	76	71	150.827	169.716	76	71.493	187.337	184.167	76	4.96	139.375	74.91	76	72.389	252.242	241.487	76	70.33	210.775	111.945
77	72	96	138	77	71	158.498	169.158	77	71.437	191.676	184.977	77	48.795	201.984	130.203	77	72	238.606	253.211	77	68.241	170.911	121.795
78	71	94	134	78	72	160.38	167.393	78	71.923	191.494	181.414	78	76.523	182.621	174.041	78	72.003	200.313	243.708	78	71.972	130.182	166.548
79	72	100	144	79	72	156.973	163.643	79	71.398	188.886	178.591	79	73.455	163.824	182.24	79	72.998	181.457	236.367	79	72.816	143.165	211.569
80	72	113	143	80	73	153.194	159.727	80	72.218	188.211	178.528	80	70.988	145.337	174.886	80	72.327	160.656	212.954	80	69.749	175.484	231.54
81	72	120	145	81	73	149.254	157.047	81	72.385	194.836	178.968	81	70.273	139.117	163.797	81	72.996	172.11	175.812	81	70.762	188.502	231.461
82	73	122	144	82	73	147.188	155.761	82	71.148	198.507	180.291	82	70.986	133.447	154.323	82	71.173	223.41	148.028	82	68.874	193.33	214.371
83	72	120	134	83	73	142.788	154.006	83	71.738	162.545	166.316	83	71.45	122.741	146.204	83	72.001	254.293	165.14	83	68.265	203.676	166.234
84	71	116	131	84	70	141.794	145.803	84	72.575	135.858	145.049	84	71.513	120.187	139.36	84	72.48	250.064	233.771	84	75.065	192.096	119.005
85	70	117	129	85	70	141.089	133.169	85	72.608	142.349	139.89	85	72.63	117.234	129.102	85	72.51	255	251.537	85	76.301	149.982	104.309
86	74	114	132	86	72	136.834	123.754	86	71.808	147.756	149.95	86	72.695	105.889	119.039	86	71.457	255	255	86	71.528	110.964	129.373
87	74	105	140	87	72	116.373	116.643	87	71.273	150.152	155.449	87	72.018	104.8	114.434	87	72.576	255	255	87	68.036	106.968	191.241
88	71	103	143	88	72	112.809	120.585	88	72.168	150.507	157.953	88	73.003	103.636	111.632	88	71.997	254.316	254.633	88	68.818	142.597	232.228
89	70	95	136	89	72	121.483	132.629	89	73.856	150.256	157.412	89	72.947	99.199	109.157	89	70.359	244.624	252.274	89	68.002	185.25	212.042
90	70	82	132	90	72	122.544	141.171	90	72.356	146.688	153.18	90	70.518	95.399	108.282	90	71.487	209.352	253.8	90	62.065	185.917	182.227
91	63	85	156	91	62	117.046	147.421	91	69.041	140.576	146.33	91	58.12	89.637	115.417	91	71.146	222.682	251.937	91	76.331	160.555	159.533
92	109	155	176	92	84	133.454	161.886	92	78.795	127.767	143.004	92	93.303	86.221	131.971	92	71.132	200.47	222.527	92	141.578	146.953	150.232
93	165	178	176	93	173	167.761	174.542	93	154.27	127.121	134.55	93	171.669	165.277	151.614	93	72.769	205.844	193.328	93	198.288	143.118	173.922
94	179	173	152	94	199	188.251	165.437	94	197.073	157.021	137.595	94	174.455	191.957	155.688	94	69.054	189.136	191.386	94	169.2	160.19	191.233
95	120	99	91	95	146	168.411	132.463	95	183.175	195.835	171.467	95	82.064	117.25	140.576	95	137.81	159.826	164.917	95	94.165	180.083	186.978
96	65	80	79	96	7	123.537	99.676	96	117.881	172.13	195.051	96	54.537	62.972	99.868	96	181.822	94.482	161.169	96	57.79	162.542	160.425
97	65	85	75	97	0	86.392	90.415	97	62.048	113.396	157.361	97	60.593	68.047	76.499	97	91.208	115.874	89.904	97	75.075	114.897	108.85
98	69	87	76	98	26	91.524	83.39	98	60.715	84.037	98.987	98	64.359	74.737	68.118	98	62.001	98.699	83.2	98	76.676	85.767	83.313
99	69	88	77	99	74	100.818	83.168	99	65.886	79.428	76.333	99	64.137	73.36	65	99	66.967	103.39	122.45	99	71.231	89.309	89.515
100	67	83	78	100	73	97	82	100	64	77	79	100	64	71	65	100	66	109	75	100	67	96	100
101	68	95	80	101	61	94.567	79.814	101	65.886	80.08	80.864	101	63.805	71.934	65.919	101	66.049	102.041	69.962	101	68.103	90.713	96.892
102	70	103	87	102	16	88.895	80.508	102	62.401	79.942	81.224	102	63.109	71.283	66.211	102	66.033	88.714	81.331	102	56.109	88.762	83.395
103	29	86	90	103	120	115.606	97.743	103	55.904	76.599	79.859	103	62.145	67.019	67.52	103	65.244	76.339	80.778	103	47.931	88.624	105.715
104	6	92	96	104	203	172.478	140.538	104	79.583	82.28	77.418	104	55.263	101.592	74.838	104	71.728	108.024	106.749	104	97.231	86.057	168.56
105	2	115	106	105	142	194.721	158.529	105	153.308	143.611	82.401	105	53.615	179.525	91.254	105	179.336	160.928	105.35	105	177.705	91.464	190.592
106	113	163	151	106	59	152.641	160.933	106	198.297	185.036	150.813	106	115.441	211.357	122.581	106	167.351	198.582	104.979	106	212.101	134.033	188.332
107	156	171	171	107	68	105.706	148.011	107	167.927	189.779	190.924	107	172.725	172.122	136.677	107	64.323	177.414	170.853	107	206.712	180.607	181.815
108	172	176	175	108	72	98.301	142.393	108	88.866	158.715	184.598	108	131.543	100.379	136.958	108	71.732	192.997	195.257	108	126.427	186.439	185.532
109	103	127	162	109	72	109.503	145.019	109	56.837	116.978	146.553	109	70.296	85.624	127.047	109	71.854	195.159	191.584	109	69.129	178.22	205.895
110	68	104	155	110	73	115.498	149.99	110	67.66	118.995	129.493	110	65.692	90.014	109.807	110	72.836	209.024	200.427	110	68.184	183.194	230.768
111	67	112	160	111	73	116.027	152.609	111	72.74	140.474	132.396	111	71.379	91.168	97.219	111	71.181	186.277	222.164	111	73.131	184.22	220.899
112	71	117	166	112	73	118.781	152.74	112	72.162	145.122	144.585	112	73.55	91.054	90.844	112	73.801	202.08	228.928	112	69.399	176.052	192.003
113	71	115	166	113	72	121.205	152.468	113	72.487	138.57	146.799	113	74.891	91.268	89.432	113	71.427	210.027	223.523	113	69.355	171.227	197.011
114	73	123	165	114	74	132.426	154.801	114	72.833	137.971	142.38	114	73.746	90.598	91.025	114	73.541	213.959	203.685	114	74.302	173.379	224.662
115	71	128	161	115	72	141.042	160.198	115	72.859	148.689	144.39	115	72.921	89.377	92.081	115	72.514	237.816	210.23	115	72.451	187.267	241.879
116	71	124	159	116	73	146.137	164.308	116	73.298	156.592	149.787	116	71.501	89.869	92.686	116	66.792	230.332	225.611	116	68.357	206.8	246.041
117	73	126	157	117	72	144.643	169.476	117	72.895	158.712	154.088	117	71.83	90.289	92.093	117	65.28	220.942	236.406	117	68.71	202.585	241.078
118	71	131	166	118	74	151.459	174.915	118	71.498	159.942	154.93	118	71.014	90.952	91.897	118	71.278	150.667	245.145	118	70.76	184.55	239.311
119	73	139	173	119	72	160.224	177.871	119	72.261	156.198	148.572	119	71.727	90.97	92	119	70.62	130.118	248.04	119	71.299	179.938	245.523
120	74	138	176	120	73	161.923	180.677	120	71.38	149.114	138.71	120	71.992	89.682	92.107	120	71.648	112.285	237.482	120	73.485	193.759	237.305
121	72	146	174	121	72	164.969	184.337	121	72.492	150.561	136.24	121	72.649	88.672	92.713	121	72.34	104.806	202.166	121	70.473	203.808	222.416
122	73	157	180	122	72	169.571	186.458	122	72.828	165.013	156.849	122	72.477	88.308	93.318	122	72.074	127.62	186.212	122	68.101	194.406	229.468
123	73	158	181	123	71	167.308	189.484	123	72.829	168.548	166.13	123	71.772	88.99	93.64	123	71.376	119.374	177.462	123	71.496	189.89	240.364
124	71	159	180	124	71	174.743	193.105	124	71.701	124.878	166.657	124	72.25	89.544	93.529	124	67.962	122.468	200.32	124	73.414	204.715	222.765
125	71	162	182	125	71	181.554	196.172	125	72.444	108.553	161.568	125	72.617	90.068	93.866	125	70.804	128.485	190.155	125	71.655	217.54	192.722
126	71	167	183	126	69	182.751	199.261	126	72.659	111.07	119.35	126	73.242	89.727	93.08	126	72.571	124.787	183.657	126	78.649	191.714	168.202
127	73	175	185	127	70	182.536	201.42	127	71.975	136.71	110.195	127	73.806	89.065	93	127	72.877	145.498	187.986	127	70.189	123.29	65.377
128	73	175	189	128	70	188.538	201.795	128	72.091	165.605	123.094	128	72.219	87.187	92.728	128	71.639	157.064	194.297	128	74.38	101.243	2.884
129	72	176	191	129	72	180.218	197.71	129	72.217	160.897	142.981	129	71.041	88.393	92.046	129	73.521	155.72	187.274	129	69.728	136.887	24.1
130	72	181	194	130	71	144.988	190.897	130	72.015	162.159	162.492	130	71.11	88.06	93.059	130	71.545	165.514	168.238	130	57.347	140.438	101.863
131	72	186	199	131	70	131.26	180.921	131	72	164.647	160.807	131	71.628	88.487	93.25	131	71.504	187.478	184.482	131	27.385	109.537	143.33
132	70	186	206	132	70	136.194	165.971	132	72	163.952	157.17	132	72.01	91.2	92.53	132	72.994	236.649	230.591	132	38.426	91.361	126.605
133	72	194	211	133	70	137.033	144.915	133	72.336	164.835	155.514	133	72	91.266	91.474	133	72.466	254.726	252.242	133	67.104	98.408	71.568
134	72	195	223	134	75	92.607	107.488	134	73.001	161.434	159.546	134	72.132	91.267	90	134	72.552	255	255	134	76.736	113.685	14.268
135	71	187	226	135	71	14.159	48.053	135	73	154.116	150.089	135	72.819	89.916	89.973	135	72.569	255	255	135	72.822	116.192	4.968
136	72	189	238	136	17	12.363	10.414	136	73	152.036	149.559	136	72.889	88.783	92.481	136	72.998	255	254.717	136	75.203	111.082	10.194
137	72	200	230	137	0	17.515	2.811	137	72.783	162.711	153.895	137	72.108	90.587	95.119	137	71.01	255	251.881	137	73.852	103.889	12.547
138	72	204	126	138	0	16.32	0	138	72.114	162.255	155.687	138	72.497	91.766	96.001	138	71	253.512	242.688	138	74.717	79.053	12.437
139	71	207	53	139	0	14.645	0	139	72.82	154.15	152.936	139	72.711	89.291	96.584	139	71.995	254.584	243.794	139	72.625	43.672	11.583
140	71	211	0	140	0	12.831	0	140	72.38	150.064	157.357	140	72.759	90.5	96.342	140	72.348	255	236.411	140	68.577	33.476	10.436
141	71	230	0	141	0	8.516	0	141	73.554	159.816	163.533	141	71.99	91.278	96.3	141	70.676	242.154	231.851	141	68	30.407	7.602
142	76	244	0	142	0	5.655	0	142	73.852	161.047	169.132	142	71.581	92.114	96.425	142	71.677	235.245	248.225	142	68	13.177	5.492
143	76	243	0	143	0	4.165	0	143	73.362	160.344	157.608	143	72.226	92.477	97.007	143	71.699	248.334	252.37	143	67.93	3.506	4.577
144	29	149	0	144	0	3.805	0	144	72.499	170.309	163.581	144	71.642	92.112	97.636	144	71.287	255	230.896	144	69.359	4.215	4.188
145	0	0	0	145	0	2.902	0	145	71.859	183.985	174.809	145	71	92.158	98	145	71.268	255	227.451	145	67.485	7.87	3.531
146	0	0	0	146	0	2.641	0	146	71.737	167.654	174.595	146	71	92.338	97.906	146	72.505	255	244.584	146	36.238	10.293	3.95
147	0	0	0	147	0	1.737	0	147	71.569	152.012	169.085	147	71	92.105	98.185	147	55.089	255	255	147	1.916	10.002	4.627
148	0	0	0	148	0	0.817	0	148	72.764	153.139	163.517	148	71.475	92.919	99.012	148	21.289	255	255	148	5.072	9.958	4.938
149	0	0	0	149	0	0.486	0	149	71.425	165.326	164.372	149	72.423	93.665	99.663	149	0.139	255	255	149	19.3	9.877	4.581
150	0	0	0	150	0	0.461	0	150	71	164.584	170.042	150	73.507	94.316	100	150	0	255	255	150	18.524	10.413	4.369
151	0	0	0	151	0	0.071	0	151	72.57	158.96	172.783	151	72.874	95.307	99.925	151	0	255	255	151	6.936	8.552	5.446
152	0	0	0	152	0	1.177	0	152	72.381	164.866	173.864	152	72.325	94.757	100	152	0	255	255	152	0.079	6.959	6.149
153	0	0	0	153	0	0.124	0	153	71.766	170.344	175.132	153	72.386	96.406	100.016	153	0	237.33	255	153	1.496	8.154	4.072
154	0	0	0	154	0	0	0	154	71.309	168.626	171.051	154	72.833	97.992	100.677	154	0	91.616	255	154	0	8.916	2.283
155	0	0	0	155	0	0	0	155	71.604	168.474	165.18	155	72.034	97.951	101.525	155	0	0	255	155	0	8.308	2.078
156	0	0	0	156	0	0	0	156	72.669	168.868	156.267	156	73.432	101.67	103.374	156	0	0	255	156	0	8.996	2.179
157	0	0	0	157	0	0	0	157	72.747	163.697	155.907	157	74	107.467	103.818	157	0	0	129.408	157	0	8.532	1.466
158	0	0	0	158	0	0	0	158	71.031	159.164	156.528	158	73.477	112.313	104	158	0	0	12.983	158	0	6.406	0.257
159	0	0	0	159	0	0	0	159	71.01	156.435	155.075	159	72.133	113.954	104	159	0	0	0	159	0	6.559	0.809
160	0	0	0	160	0	0	0	160	72.354	160.455	161.088	160	72	116.034	105	160	0	0	0	160	0	6.953	0.293
161	0	0	0	161	0	0	0	161	72.969	167.379	168.477	161	72.106	120.337	107.586	161	0	0	0	161	0	6.262	0.09
162	0	0	0	162	0	0	0	162	71.473	172.395	164.076	162	72.54	119.531	111.46	162	0	0	0	162	0	5.01	0.338
163	0	0	0	163	0	0	0	163	70.529	180.319	154.594	163	72	111.049	115.283	163	0	0	0	163	0	5.784	0.585
164	0	0	0	164	0	0	0	164	71.929	178.825	147.566	164	72	122.544	116.684	164	0	0	0	164	0	5.992	0.833
165	0	0	0	165	0	0	0	165	72.461	181.538	156.403	165	72.147	136.978	116.05	165	0	0	0	165	0	6.416	1.002
166	0	0	0	166	0	0	0	166	73	183.443	155.419	166	72.017	138.107	111.366	166	0	0	0	166	0	6.495	0.051
167	0	0	0	167	0	0	0	167	72.851	183.848	154.002	167	72.901	140.025	116.165	167	0	0	0	167	0	5.365	0
168	0	0	0	168	0	0	0	168	72.092	185.073	166.967	168	72.802	139.765	126.129	168	0	0	0	168	0	3.891	0
169	0	0	0	169	0	0	0	169	73.143	185.906	171.492	169	71.307	137.844	136.046	169	0	0	0	169	0	4.088	0.139
170	0	0	0	170	0	0	0	170	71.348	189.314	179.552	170	72.031	151.801	141.489	170	0	0	0	170	0	4.989	0.373
171	0	0	0	171	0	0	0	171	71.812	195.727	179.881	171	72.558	157.538	144.997	171	0	0	0	171	0	5.009	0.462
172	0	0	0	172	0	0	0	172	72.457	200.313	185.493	172	71.995	122.949	145.722	172	0	0	0	172	0	4.56	0.188
173	0	0	0	173	0	0	0	173	72.916	171.579	168.166	173	72.601	58.56	146.192	173	0	0	0	173	0	2.349	0.688
174	0	0	0	174	0	0	0	174	72.228	144.394	160.678	174	72.394	10.374	146.797	174	0	0	0	174	0	1.969	0.694
175	0	0	0	175	0	0	0	175	72.013	187.47	171.42	175	72.852	0	149.477	175	0	0	0	175	0	2	0.148
176	0	0	0	176	0	0	0	176	72.25	197.575	176.115	176	72.819	0	153.48	176	0	0	0	176	0	0.426	0
177	0	0	0	177	0	0	0	177	71.803	190.241	179.062	177	72.709	0	155.399	177	0	0	0	177	0	0	0
178	0	0	0	178	0	0	0	178	71.009	188.842	181.866	178	72.618	0	154.112	178	0	0	0	178	0	0	0.576
179	0	0	0	179	0	0	0	179	71.738	195.764	183.923	179	72.407	0	142.878	179	0	0	0	179	0	0	0.456
180	0	0	0	180	0	0	0	180	72.579	198.723	174.925	180	71.026	0	127.863	180	0	0	0	180	0	0	0
181	0	0	0	181	0	0	0	181	71.861	205.484	171.337	181	71	0	107.101	181	0	0	0	181	0	0	0
182	0	0	0	182	0	0	0	182	71.338	208.473	192.037	182	71.225	0	79.163	182	0	0	0	182	0	0	0
183	0	0	0	183	0	0	0	183	71.289	89.69	153.73	183	71.85	0	36.881	183	0	0	0	183	0	0	0
184	0	0	0	184	0	0	0	184	71.588	17.561	32.676	184	71.407	0	7.232	184	0	0	0	184	0	0	0
185	0	0	0	185	0	0	0	185	71	0.792	0.017	185	71.099	0	0.375	185	0	0	0	185	0	0	0
186	0	0	0	186	0	0	0	186	71.182	0	0	186	71.612	0	0	186	0	0	0	186	0	0	0
187	0	0	0	187	0	0	0	187	71.605	0	0	187	71.064	0	0	187	0	0	0	187	0	0	0
188	0	0	0	188	0	0	0	188	71	0	0	188	70.981	0	0	188	0	0	0	188	0	0	0
189	0	0	0	189	0	0	0	189	71	0	0	189	70.8	0	0	189	0	0	0	189	0	0	0
190	0	0	0	190	0	0	0	190	77.096	0	0	190	72.552	0	0	190	0	0	0	190	0	0	0
191	0	0	0	191	0	0	0	191	65.398	0	0	191	75.618	0	0	191	0	0	0	191	0	0	0
192	0	0	0	192	0	0	0	192	24.924	0	0	192	63.353	0	0	192	0	0	0	192	0	0	0
193	0	0	0	193	0	0	0	193	0.465	0	0	193	26.485	0	0	193	0	0	0	193	0	0	0
194	0	0	0	194	0	0	0	194	0	0	0	194	2.391	0	0	194	0	0	0	194	0	0	0
195	0	0	0	195	0	0	0	195	0	0	0	195	0	0	0	195	0	0	0	195	0	0	0
196	0	0	0	196	0	0	0	196	0	0	0	196	0	0	0	196	0	0	0	196	0	0	0
197	0	0	0	197	0	0	0	197	0	0	0	197	0	0	0	197	0	0	0	197	0	0	0
198	0	0	0	198	0	0	0	198	0	0	0	198	0	0	0	198	0	0	0	198	0	0	0
199	0	0	0	199	0	0	0	199	0	0	0	199	0	0	0	199	0	0	0	199	0	0	0
200	0	0	0	200	0	0	0	200	0	0	0	200	0	0	0	200	0	0	0	200	0	0	0

## Sheet: Figure 7
	Day 0	28	56	diff 0-28	diff 28-56	overall
MUTVSFI	19607.9	19301.8	16751.6	-0.01561	-0.132123	-0.145671
MUTV2C	36287	35823	31740.6	-0.0127868	-0.113962	-0.125292
MUTV2A	32438.2	26214.4	25197.3	-0.191867	-0.0387992	-0.223222
MUTVDVR	42775.7	40740.3	39182.5	-0.0475844	-0.0382373	-0.0840023
MUTV2DC	48673	41270.9	41565.9	-0.152079	0.00714945	-0.146017
MUTV2IC	33539.5	22761	21635.3	-0.321365	-0.0494593	-0.35493
