# Supplementary material for: Experimental assessment of diffusible iodine-based contrast-enhanced computed tomography (diceCT) protocols
Source: PeerJ. 2024 Sep 5;12:e17919. doi: 10.7717/peerj.17919 (PMC11380835; doi:10.7717/peerj.17919)
Supplement: Supplemental Information 5 [file peerj-12-17919-s005.xlsx]

## Sheet: DOIs
Specimen	Data	Media ID	DOI
MUTV1C	CT Day 0	615049	https://doi.org/10.17602/M2/M615049
MUTV1C	Volume Day 0	615448	https://doi.org/10.17602/M2/M615448
MUTV1C	Cross Section Day 0	623523	https://doi.org/10.17602/M2/M623523
MUTV1C	CT Day 7	620901	https://doi.org/10.17602/M2/M620901
MUTV1C	Volume Day 7	622283	https://doi.org/10.17602/M2/M622283
MUTV1C	Cross Section Day 7	623526	https://doi.org/10.17602/M2/M623526
MUTV1C	CT Day 14	620904	https://doi.org/10.17602/M2/M620904
MUTV1C	Volume Day 14	621978	https://doi.org/10.17602/M2/M623528
MUTV1C	Cross Section Day 14	623528	https://doi.org/10.17602/M2/M623528
MUTV1C	CT Day 21	620907	https://doi.org/10.17602/M2/M620907
MUTV1C	Volume Day 21	621984	https://doi.org/10.17602/M2/M621984
MUTV1C	Cross Section Day 21	623531	https://doi.org/10.17602/M2/M623531
MUTV1C	CT Day 28	620963	https://doi.org/10.17602/M2/M620963
MUTV1C	Volume Day 28	622002	https://doi.org/10.17602/M2/M623535
MUTV1C	Cross Section Day 28	623535	https://doi.org/10.17602/M2/M623535
MUTV1C	CT Day 35	620966	https://doi.org/10.17602/M2/M620966
MUTV1C	Volume Day 35	621993	https://doi.org/10.17602/M2/M621993
MUTV1C	Cross Section Day 35	623538	https://doi.org/10.17602/M2/M623538
MUTV1C	CT Day 42	620969	https://doi.org/10.17602/M2/M620969
MUTV1C	Volume Day 42	621996	https://doi.org/10.17602/M2/M621996
MUTV1C	Cross Section Day 42	623541	https://doi.org/10.17602/M2/M623541
MUTV1C	CT Day 49	620972	https://doi.org/10.17602/M2/M620972
MUTV1C	Volume Day 49	622024	https://doi.org/10.17602/M2/M622024
MUTV1C	Cross Section Day 49	623544	https://doi.org/10.17602/M2/623544
MUTV1C	CT Day 56	621777	https://doi.org/10.17602/M2/M621777
MUTV1C	Volume Day 56	622038	https://doi.org/10.17602/M2/M622038
MUTV1C	Cross Section Day 56	623723	https://doi.org/10.17602/M2/M623723
MUTV2A	CT Day 0	619563	https://doi.org/10.17602/M2/M619563
MUTV2A	Volume Day 0	622041	https://doi.org/10.17602/M2/M622041
MUTV2A	Cross Section Day 0	623716	https://doi.org/10.17602/M2/M623716
MUTV2A	CT Day 28	621780	https://doi.org/10.17602/M2/M621780
MUTV2A	Volume Day 28	622033	https://doi.org/10.17602/M2/M622033
MUTV2A	Cross Section Day 28	623719	https://doi.org/10.17602/M2/M623719
MUTV2A	CT Day 56	621783	https://doi.org/10.17602/M2/M621783
MUTV2A	Volume Day 56	622038	https://doi.org/10.17602/M2/M622038
MUTV2A	Cross Section Day 56	623723	https://doi.org/10.17602/M2/M623723
MUTV2C	CT Day 0	619568	https://doi.org/10.17602/M2/M619568
MUTV2C	Volume Day 0	622044	https://doi.org/10.17602/M2/M622044
MUTV2C	Cross Section Day 0	623724	https://doi.org/10.17602/M2/M623724
MUTV2C	CT Day 28	621786	https://doi.org/10.17602/M2/M621786
MUTV2C	Volume Day 28	622047	https://doi.org/10.17602/M2/M622047
MUTV2C	Cross Section Day 28	623728	https://doi.org/10.17602/M2/M623728
MUTV2C	CT Day 56	621789	https://doi.org/10.17602/M2/M621789
MUTV2C	Volume Day 56	622050	https://doi.org/10.17602/M2/M622050
MUTV2C	Cross Section Day 56	623731	https://doi.org/10.17602/M2/M623731
MUTV2SFI	CT Day 0	619594	https://doi.org/10.17602/M2/M619594
MUTV2SFI	Volume Day 0	622250	https://doi.org/10.17602/M2/M622250
MUTV2SFI	Cross Section Day 0	623764	https://doi.org/10.17602/M2/M623764
MUTV2SFI	CT Day 28	621943	https://doi.org/10.17602/M2/M621943
MUTV2SFI	Volume Day 28	622253	https://doi.org/10.17602/M2/M622253
MUTV2SFI	Cross Section Day 28	623767	https://doi.org/10.17602/M2/M623767
MUTV2SFI	CT Day 56	621946	https://doi.org/10.17602/M2/M621946
MUTV2SFI	Volume Day 56	622256	https://doi.org/10.17602/M2/M622256
MUTV2SFI	Cross Section Day 56	623770	https://doi.org/10.17602/M2/M623770
MUTV2DVR	CT Day 0	619589	https://doi.org/10.17602/M2/M619589
MUTV2DVR	Volume Day 0	622062	https://doi.org/10.17602/M2/M622062
MUTV2DVR	Cross Section Day 0	623747	https://doi.org/10.17602/M2/M623747
MUTV2DVR	CT Day 28	621949	https://doi.org/10.17602/M2/M621949
MUTV2DVR	Volume Day 28	622065	https://doi.org/10.17602/M2/M622065
MUTV2DVR	Cross Section Day 28	623749	https://doi.org/10.17602/M2/M623749
MUTV2DVR	CT Day 56	621952	https://doi.org/10.17602/M2/M621952
MUTV2DVR	Volume Day 56	622068	https://doi.org/10.17602/M2/M622068
MUTV2DVR	Cross Section Day 56	623751	https://doi.org/10.17602/M2/M623751
MUTV2DC	CT Day 0	619574	https://doi.org/10.17602/M2/M619574
MUTV2DC	Volume Day 0	622053	https://doi.org/10.17602/M2/M622053
MUTV2DC	Cross Section Day 0	623735	https://doi.org/10.17602/M2/M623735
MUTV2DC	CT Day 28	621972	https://doi.org/10.17602/M2/M621972
MUTV2DC	Volume Day 28	622056	https://doi.org/10.17602/M2/M622056
MUTV2DC	Cross Section Day 28	623736	https://doi.org/10.17602/M2/M623736
MUTV2DC	CT Day 56	621969	https://doi.org/10.17602/M2/M621969
MUTV2DC	Volume Day 56	622059	https://doi.org/10.17602/M2/M622059
MUTV2DC	Cross Section Day 56	623743	https://doi.org/10.17602/M2/M623743
MUTV2IC	CT Day 0	619584	https://doi.org/10.17602/M2/M619584
MUTV2IC	Volume Day 0	622236	https://doi.org/10.17602/M2/M622236
MUTV2IC	Cross Section Day 0	623755	https://doi.org/10.17602/M2/M623755
MUTV2IC	CT Day 28	621975	https://doi.org/10.17602/M2/M621975
MUTV2IC	Volume Day 28	622239	https://doi.org/10.17602/M2/M622239
MUTV2IC	Cross Section Day 28	623758	https://doi.org/10.17602/M2/M623758
MUTV2IC	CT Day 56	621987	https://doi.org/10.17602/M2/M621987
MUTV2IC	Volume Day 56	622242	https://doi.org/10.17602/M2/M622242
MUTV2IC	Cross Section Day 56	623761	https://doi.org/10.17602/M2/M623761
